# Supplementary material for: Pd(ii)-catalyzed cycloisomerisation of γ-alkynoic acids and one-pot tandem cycloisomerisation/CuAAC reactions in water
Source: Royal Society of Chemistry journal article supplement (doi:10.1039/c2gc36176k), 2012-01-01
Supplement: c2gc36176k.pdf [file c2gc36176k.pdf]

**Electronic Supplementary Information**

**Pd(II)-Catalyzed Cycloisomerisation of  $\gamma$ -Alkynoic Acids and  
One-Pot Tandem Cycloisomerisation/CuAAC Reactions in  
Water.**

**Joaquín García-Álvarez,<sup>a\*</sup> Josefina Díez<sup>a</sup> and Cristian Vidal<sup>a</sup>**

*Laboratorio de Química Organometálica y Catálisis (Unidad Asociada al CSIC).  
Departamento de Química Orgánica e Inorgánica, Instituto Universitario de Química  
Organometálica "Enrique Moles", Facultad de Química, Universidad de Oviedo, E-  
33071, Oviedo, Spain*

**Table of Contents**

|                                                                                                   |     |
|---------------------------------------------------------------------------------------------------|-----|
| <b><sup>1</sup>H and <sup>13</sup>C{<sup>1</sup>H} NMR spectra of enol-lactones 5a-h and 7a-e</b> | S2  |
| <b><sup>1</sup>H and <sup>13</sup>C{<sup>1</sup>H} NMR spectra of triazole-enol-lactones 9a-i</b> | S15 |
| <b>Crystal data and structure refine for compounds 3 and 9b</b>                                   | S24 |
| <b>References</b>                                                                                 | S27 |

# $^1\text{H}$ and $^{13}\text{C}\{^1\text{H}\}$ NMR spectra of enol-lactones 5a-h and 7a-e

## 5-methylenedihydrofuran-2(3H)-one (5a)

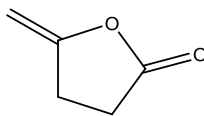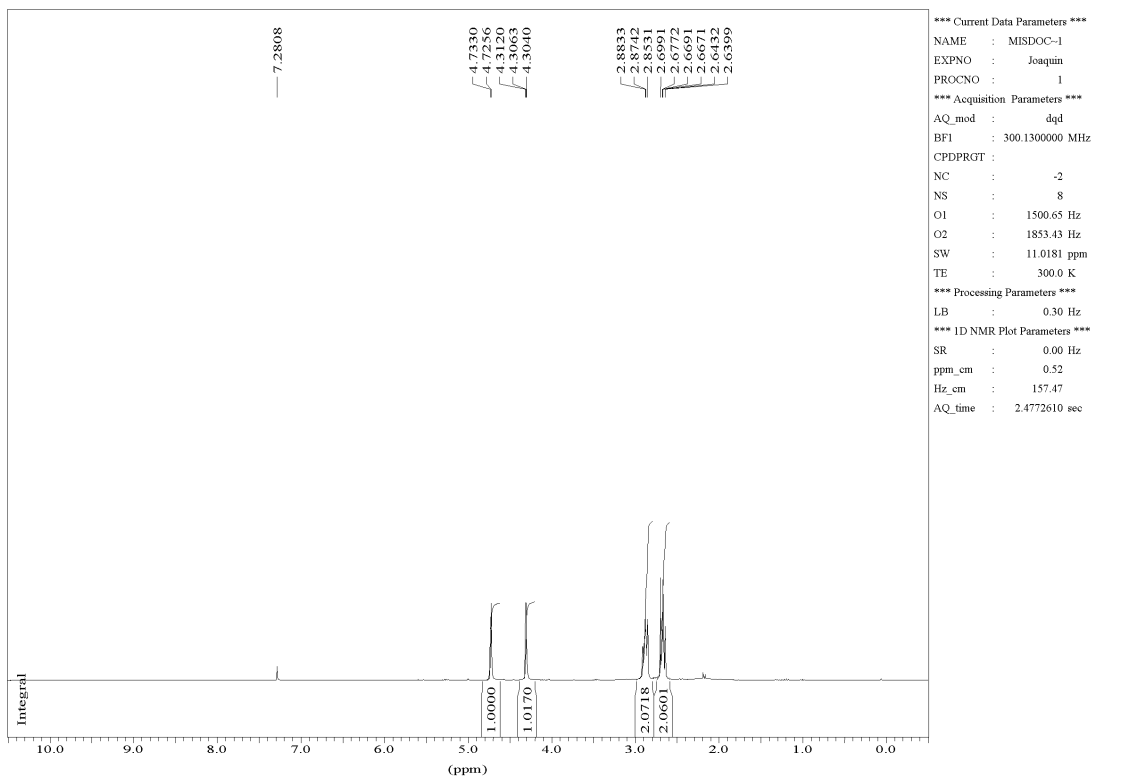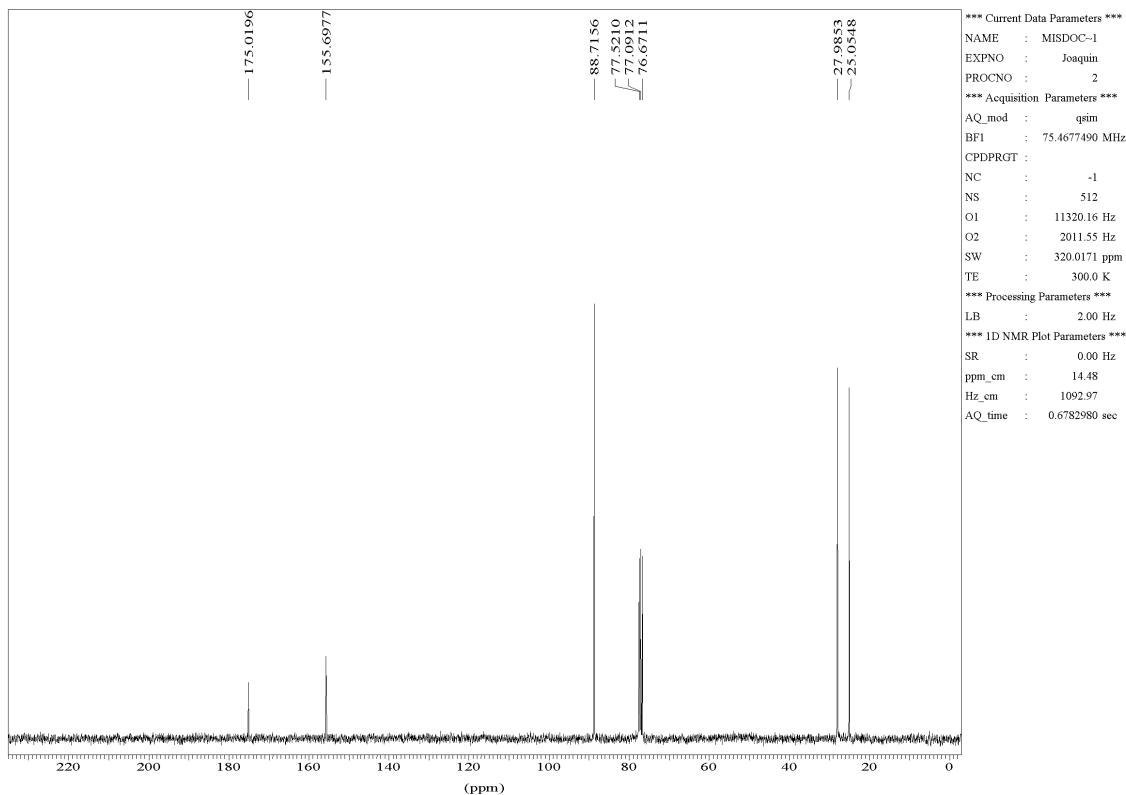

### methyl 5-methylene-2-oxotetrahydrofuran-3-carboxylate (5b)

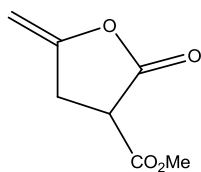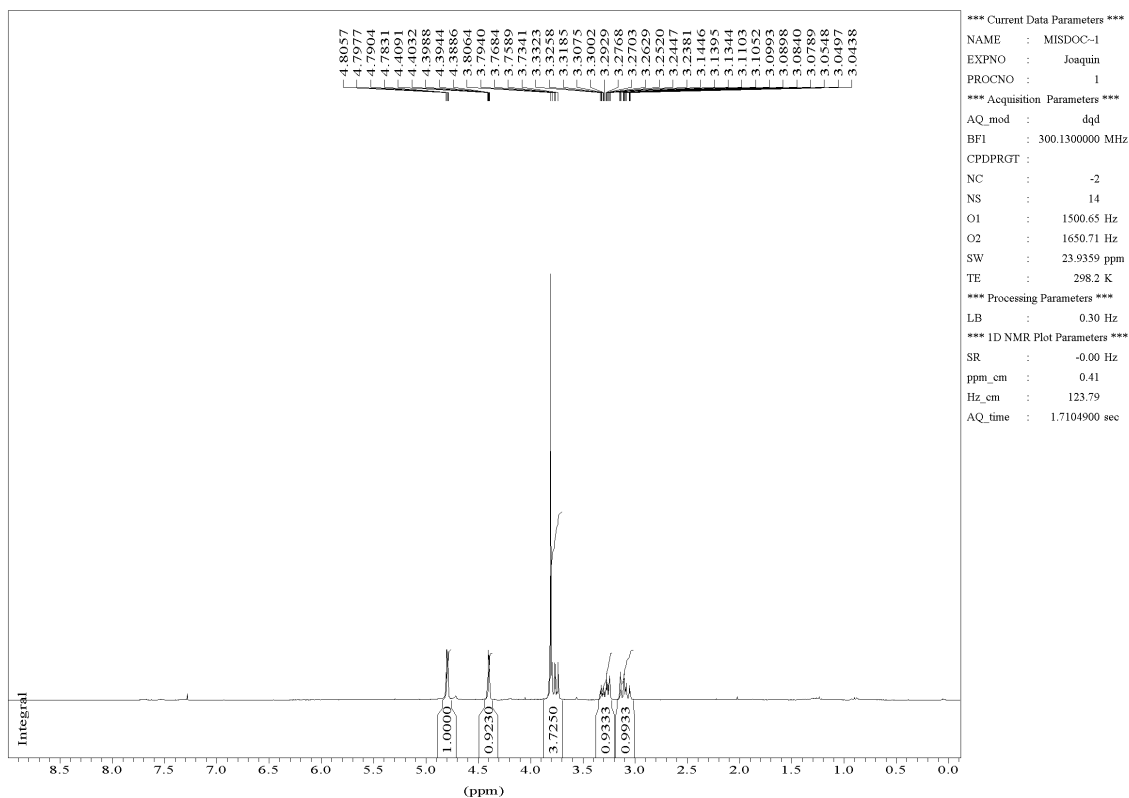

\*\*\* Current Data Parameters \*\*\*  
NAME : MISDOC-1  
EXPNO : Joaquin  
PROCNO : 1  
\*\*\* Acquisition Parameters \*\*\*  
AQ\_mod : dqd  
BFI : 300.1300000 MHz  
CPDPRGT :  
NC : -2  
NS : 14  
O1 : 1500.65 Hz  
O2 : 1650.71 Hz  
SW : 23.9359 ppm  
TE : 298.2 K  
\*\*\* Processing Parameters \*\*\*  
LB : 0.30 Hz  
\*\*\* 1D NMR Plot Parameters \*\*\*  
SR : -0.00 Hz  
ppm\_cm : 0.41  
Hz\_cm : 123.79  
AQ\_time : 1.7104900 sec

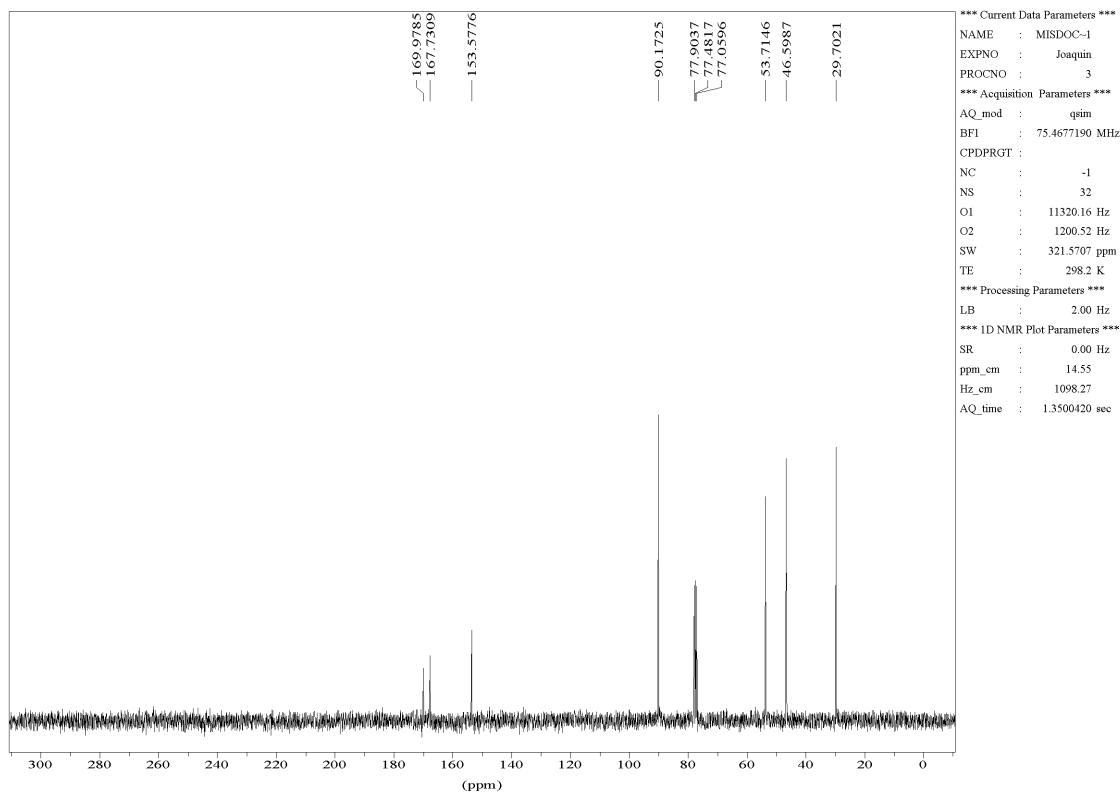

\*\*\* Current Data Parameters \*\*\*  
NAME : MISDOC-1  
EXPNO : Joaquin  
PROCNO : 3  
\*\*\* Acquisition Parameters \*\*\*  
AQ\_mod : qsim  
BFI : 75.4677190 MHz  
CPDPRGT :  
NC : -1  
NS : 32  
O1 : 11320.16 Hz  
O2 : 1200.52 Hz  
SW : 321.5707 ppm  
TE : 298.2 K  
\*\*\* Processing Parameters \*\*\*  
LB : 2.00 Hz  
\*\*\* 1D NMR Plot Parameters \*\*\*  
SR : 0.00 Hz  
ppm\_cm : 14.55  
Hz\_cm : 1098.27  
AQ\_time : 1.3500420 sec

### tert-butyl 5-methylene-2-oxotetrahydrofuran-3-ylcarbamate (5c)

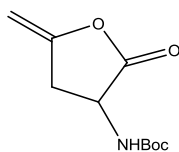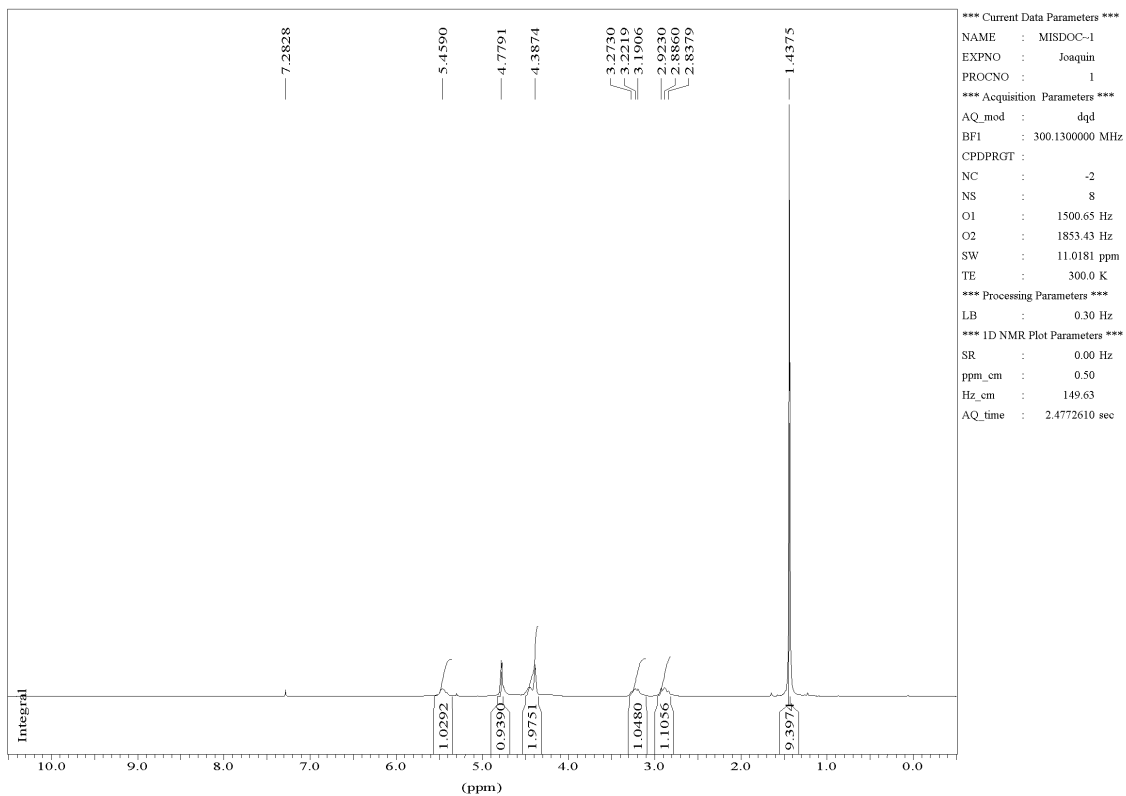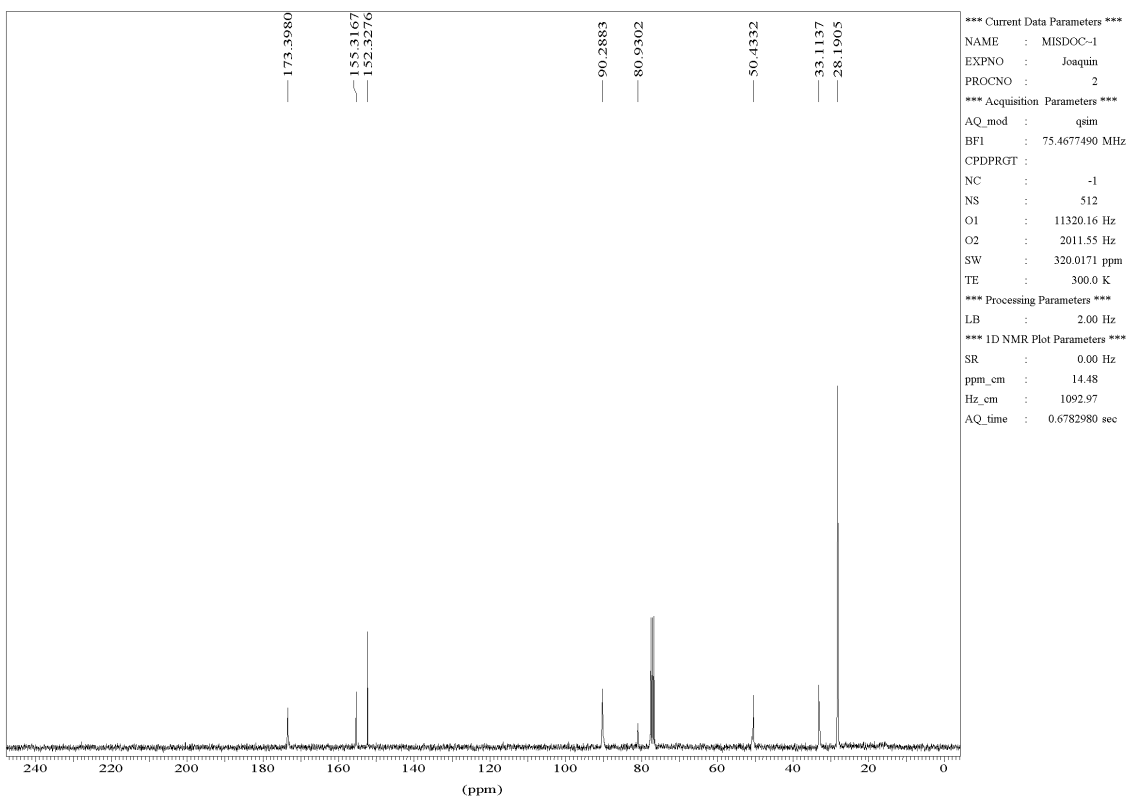

### methyl 3-methyl-5-methylene-2-oxotetrahydrofuran-3-carboxylate (5d)

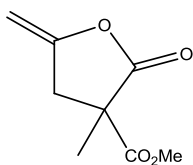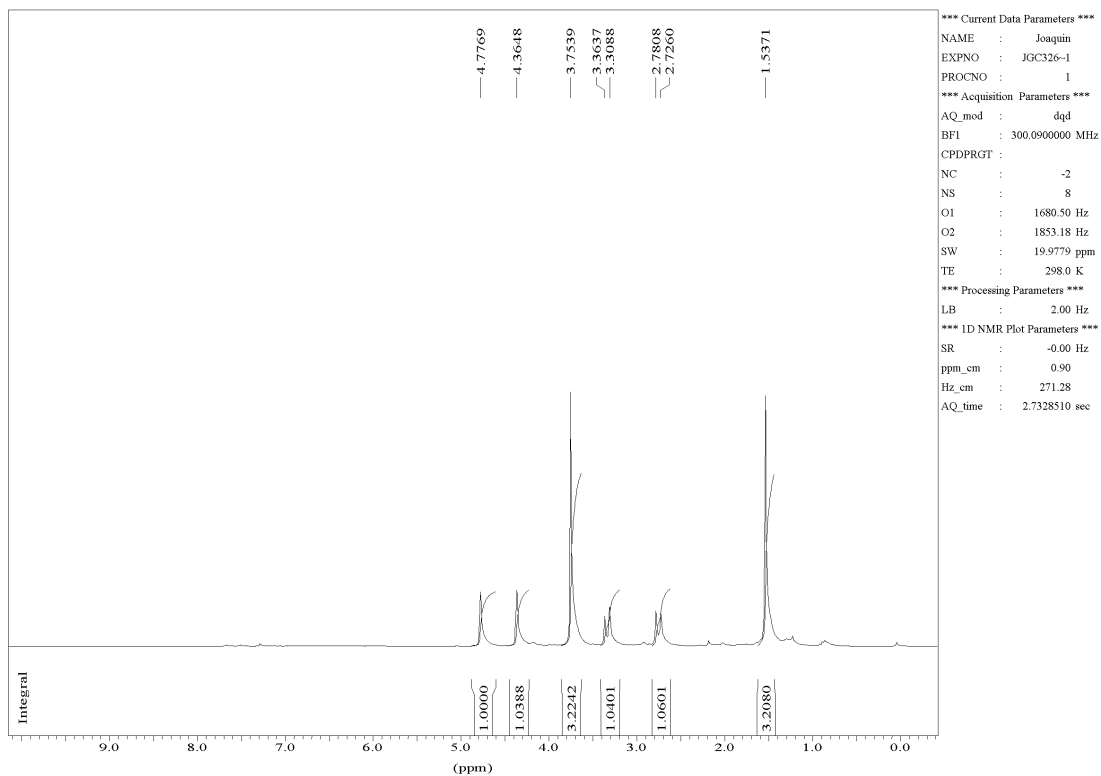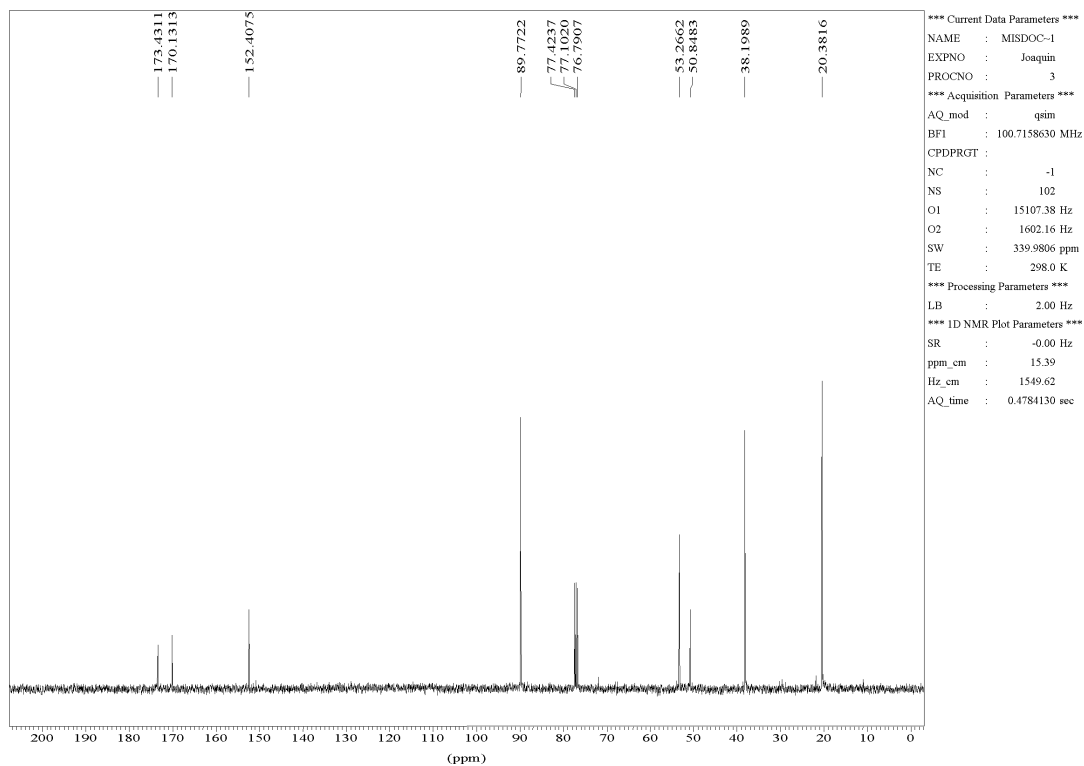

### methyl 3-ethyl-5-methylene-2-oxotetrahydrofuran-3-carboxylate (5e)

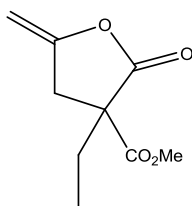

facturar a vcm  
h1wsopt CDCl3 {C:\Bruker\bacs} Bruker 45

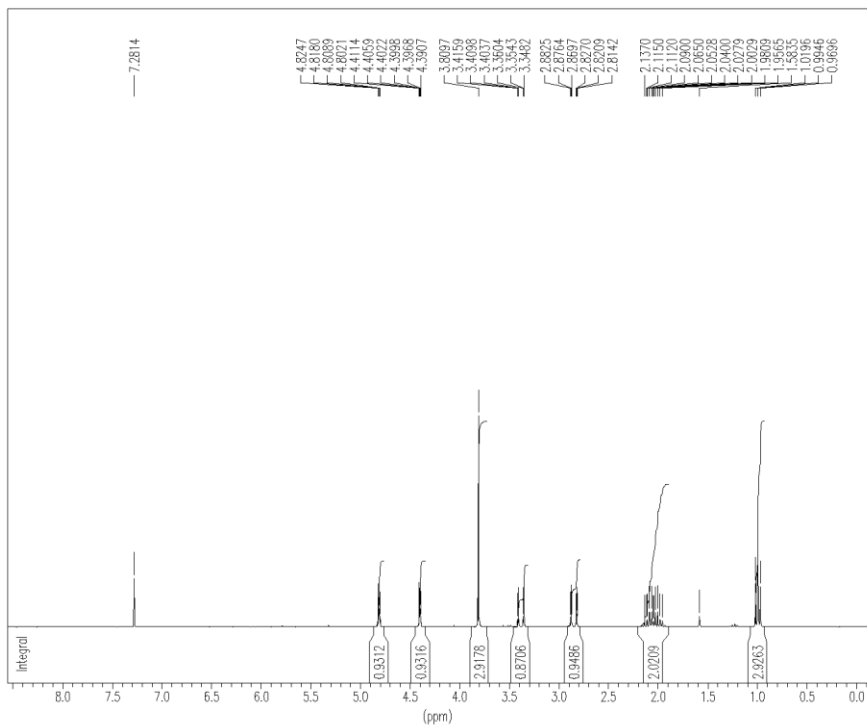

\*\*\* Current Data Parameters \*\*\*  
NAME : ESCRIT~1  
EXPNO : RMN  
PROCNO : 1  
\*\*\* Acquisition Parameters \*\*\*  
BF1 : 300.1300000 MHz

facturar a vcm  
c13swopt CDCl3 {C:\Bruker\bacs} Bruker 45

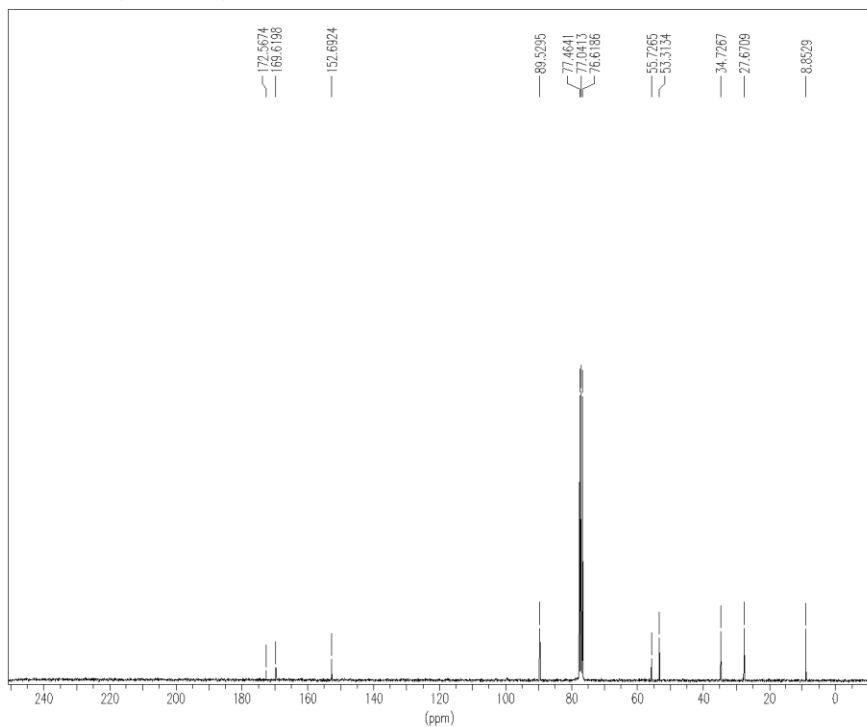

\*\*\* Current Data Parameters \*\*\*  
NAME : ESCRIT~1  
EXPNO : RMN  
PROCNO : 2  
\*\*\* Acquisition Parameters \*\*\*  
BF1 : 75.4677490 MHz

**methyl 3-allyl-5-methylene-2-oxotetrahydrofuran-3-carboxylate (5f)**

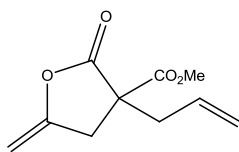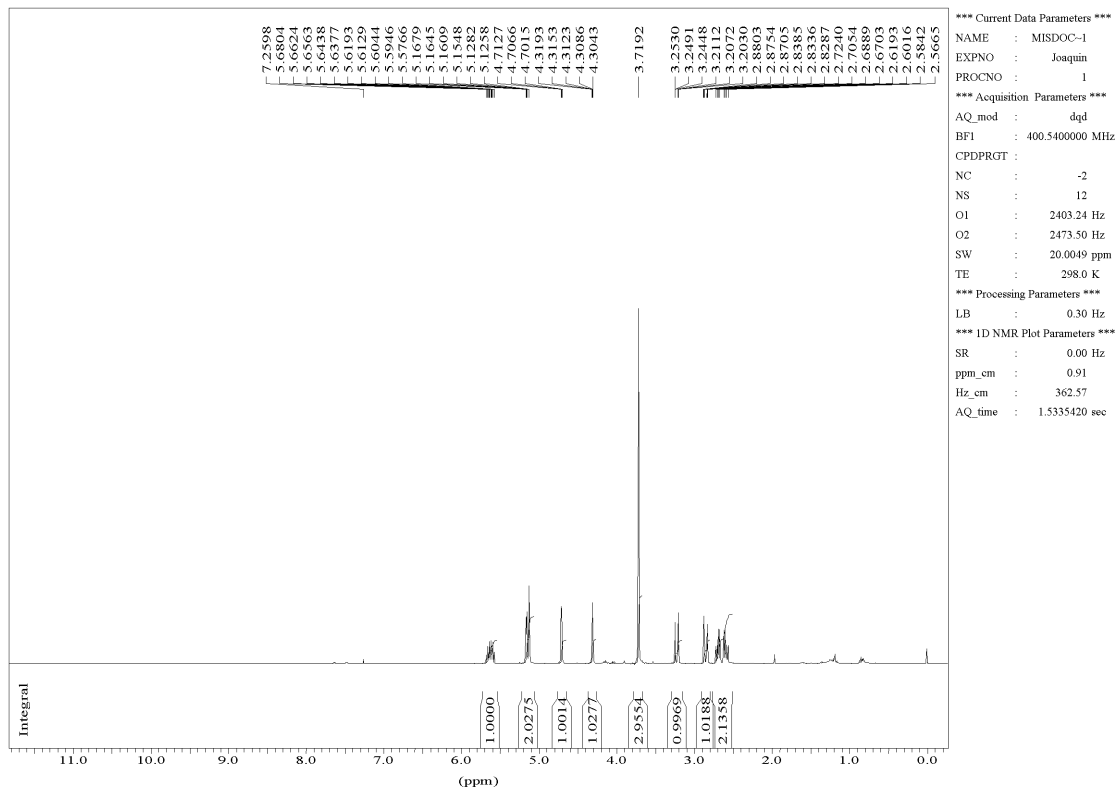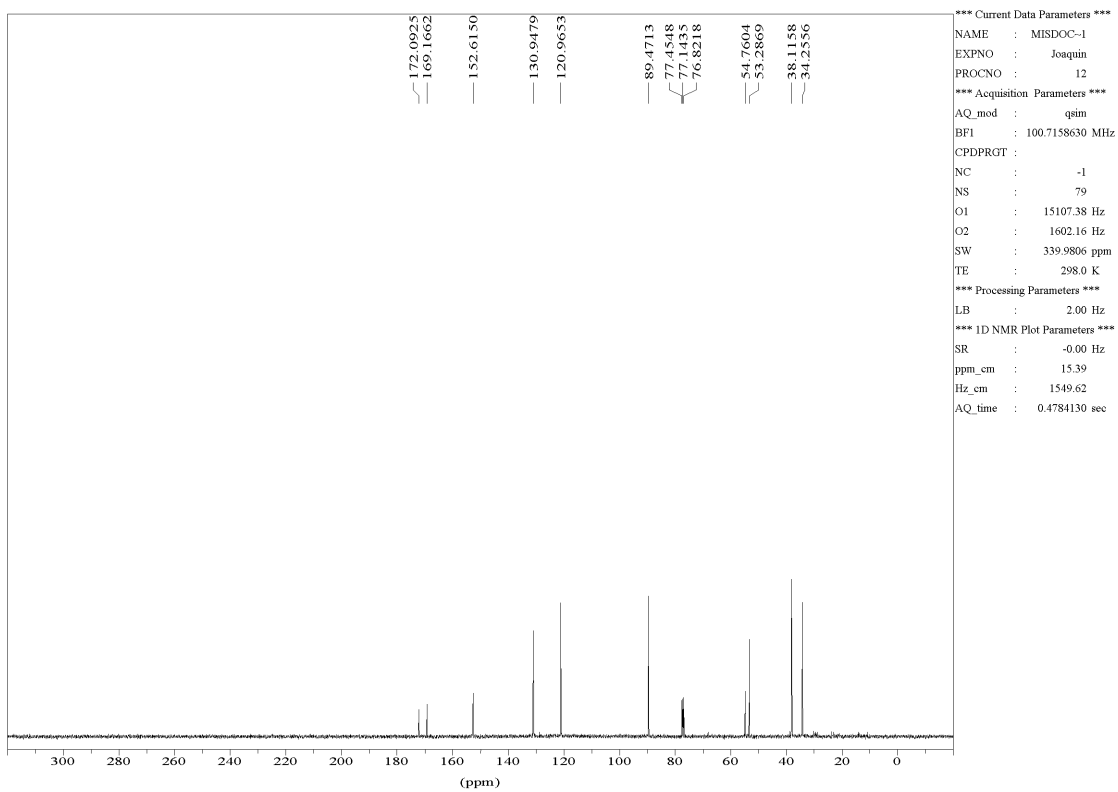

# methyl 3-cinnamyl-5-methylene-2-oxotetrahydrofuran-3-carboxylate (5g)

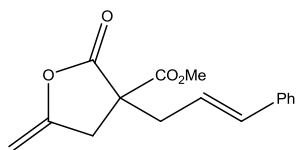

facturar a vem  
JGC 328 extraido CDCl3  
h1.10 CDCl3 (C:\Bruker\baes) Bruker 49

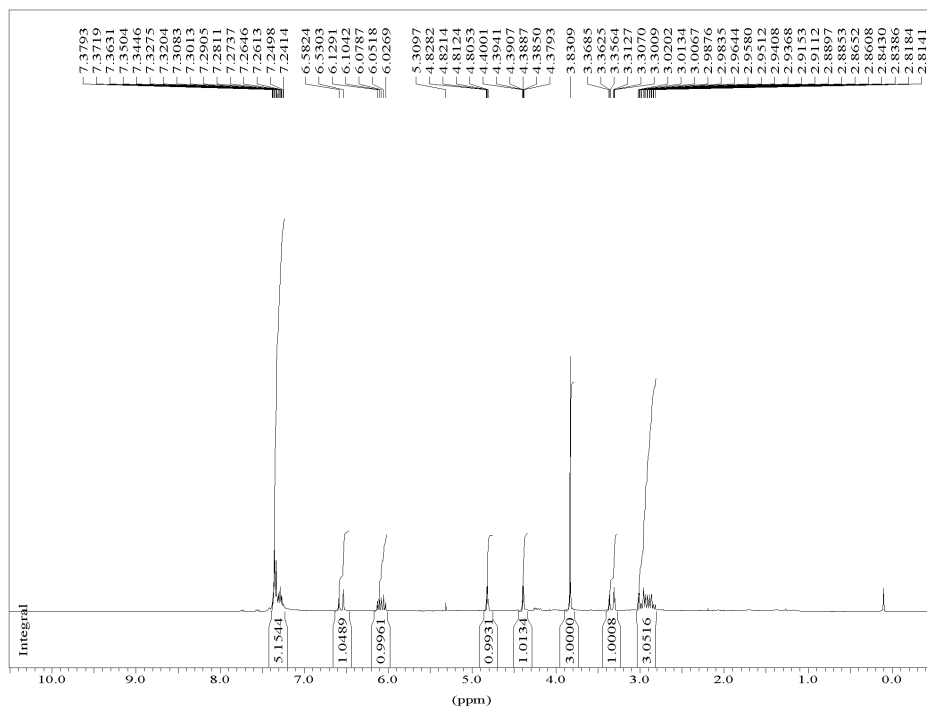

\*\*\* Current Data Parameters \*\*\*  
NAME : MISDOC-1  
EXPNO : Joaquin  
PROCNO : 1  
\*\*\* Acquisition Parameters \*\*\*  
AQ\_mod : dgd  
BFI : 300.1300000 MHz  
CPDPRGT :  
NC : -2  
NS : 8  
O1 : 1500.65 Hz  
O2 : 1853.43 Hz  
SW : 11.0181 ppm  
TE : 300.0 K  
\*\*\* Processing Parameters \*\*\*  
LB : 0.30 Hz  
\*\*\* 1D NMR Plot Parameters \*\*\*  
SR : 0.00 Hz  
ppm\_cm : 0.50  
Hz\_cm : 149.63  
AQ\_time : 2.4772610 sec

facturar a vem  
JGC 328 extraido CDCl3  
c13.300 CDCl3 (C:\Bruker\baes) Bruker 49

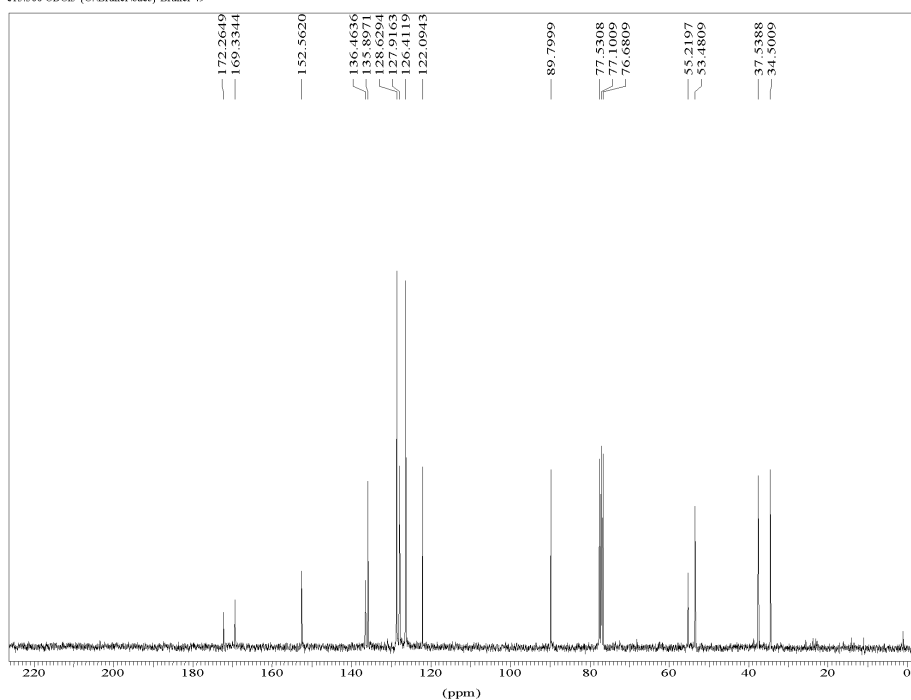

\*\*\* Current Data Parameters \*\*\*  
NAME : MISDOC-1  
EXPNO : Joaquin  
PROCNO : 2  
\*\*\* Acquisition Parameters \*\*\*  
AQ\_mod : qim  
BFI : 75.4677490 MHz  
CPDPRGT :  
NC : -1  
NS : 512  
O1 : 11320.16 Hz  
O2 : 2011.55 Hz  
SW : 320.0171 ppm  
TE : 300.0 K  
\*\*\* Processing Parameters \*\*\*  
LB : 2.00 Hz  
\*\*\* 1D NMR Plot Parameters \*\*\*  
SR : 0.00 Hz  
ppm\_cm : 10.32  
Hz\_cm : 778.97  
AQ\_time : 0.6782980 sec



### (Z)-methyl 3-ethyl-5-ethylidene-2-oxotetrahydrofuran-3-carboxylate (5h)

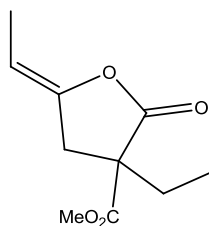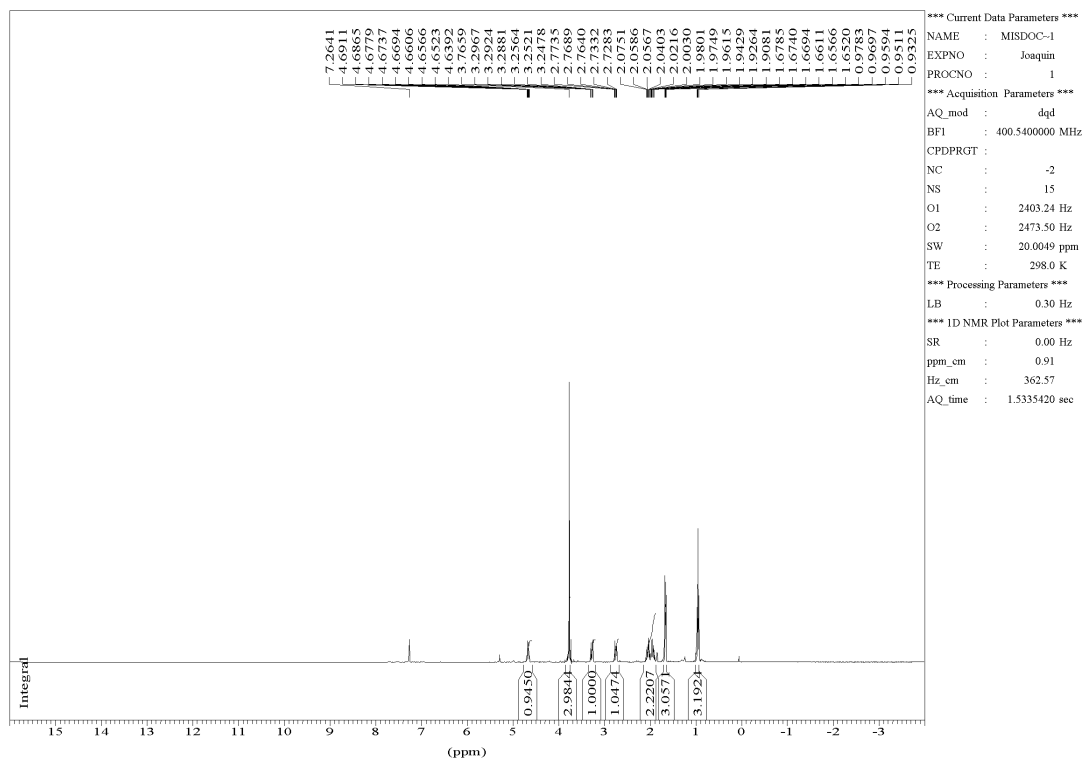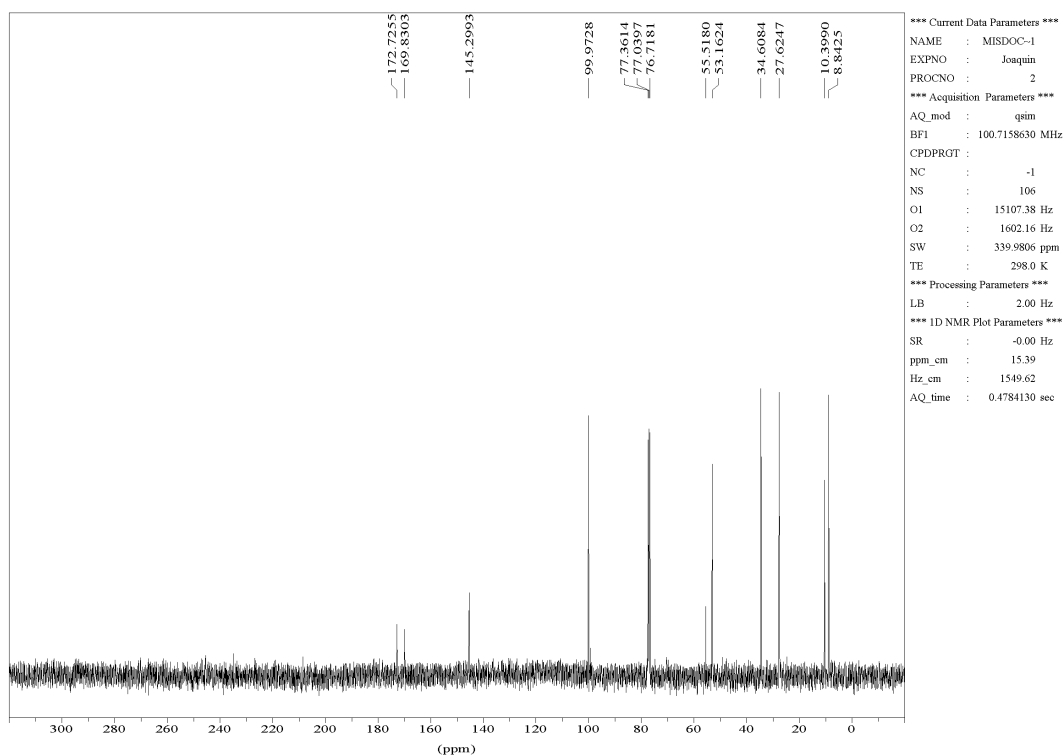

### 5-methylene-3-(prop-2-ynyl)dihydrofuran-2(3H)-one (7a)

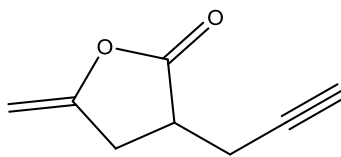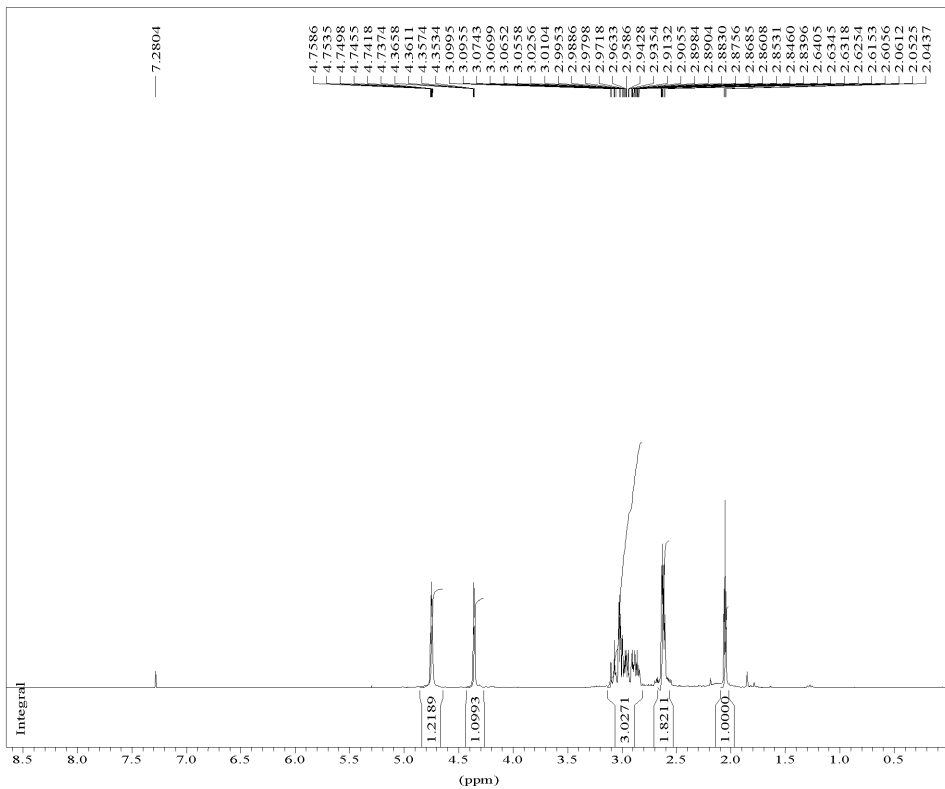

\*\*\* Current Data Parameters \*\*\*  
 NAME : MISDOC-1  
 EXPNO : Joaquin  
 PROCNO : 1  
 \*\*\* Acquisition Parameters \*\*\*  
 AQ\_mod : dqd  
 BFI : 300.1300000 MHz  
 CPDPRGT :  
 NC : -2  
 NS : 8  
 O1 : 1500.65 Hz  
 O2 : 1853.43 Hz  
 SW : 11.0181 ppm  
 TE : 300.0 K  
 \*\*\* Processing Parameters \*\*\*  
 LB : 0.30 Hz  
 \*\*\* 1D NMR Plot Parameters \*\*\*  
 SR : 0.00 Hz  
 ppm\_cm : 0.39  
 Hz\_cm : 118.14  
 AQ\_time : 2.4772610 sec

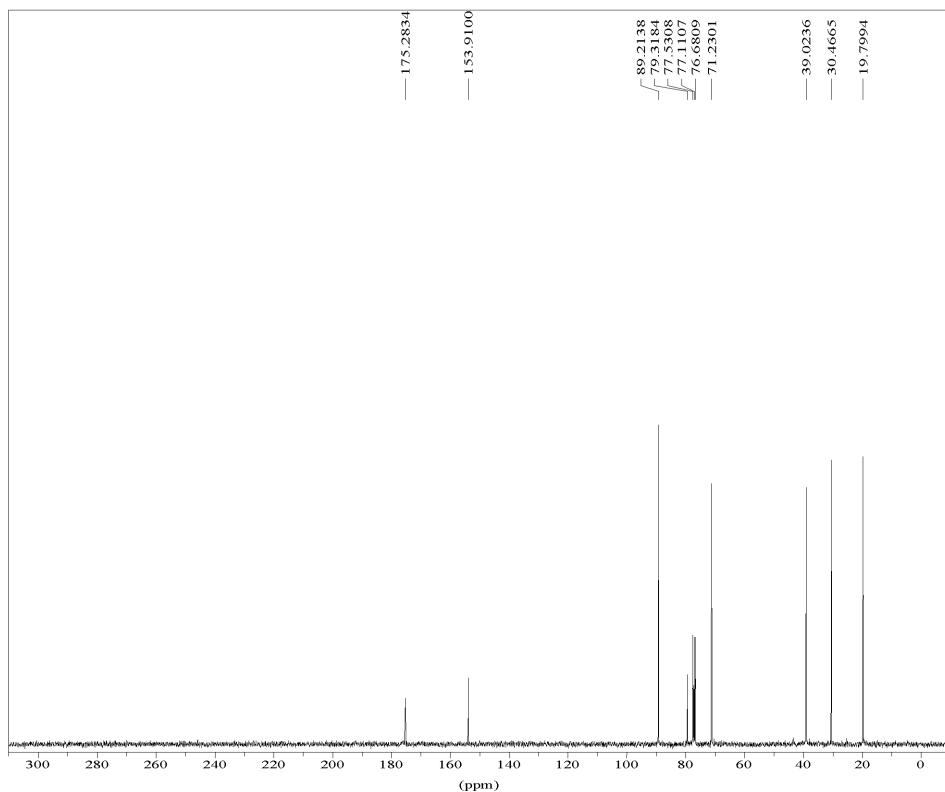

\*\*\* Current Data Parameters \*\*\*  
 NAME : MISDOC-1  
 EXPNO : Joaquin  
 PROCNO : 2  
 \*\*\* Acquisition Parameters \*\*\*  
 AQ\_mod : qsim  
 BFI : 75.4677490 MHz  
 CPDPRGT :  
 NC : -1  
 NS : 512  
 O1 : 11320.16 Hz  
 O2 : 2011.55 Hz  
 SW : 320.0171 ppm  
 TE : 300.0 K  
 \*\*\* Processing Parameters \*\*\*  
 LB : 2.00 Hz  
 \*\*\* 1D NMR Plot Parameters \*\*\*  
 SR : 0.00 Hz  
 ppm\_cm : 14.48  
 Hz\_cm : 1092.97  
 AQ\_time : 0.6782980 sec

### methyl 5-methylene-2-oxo-3-(prop-2-ynyl)tetrahydrofuran-3-carboxylate (7b)

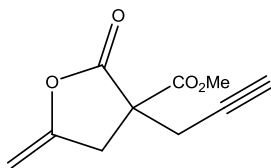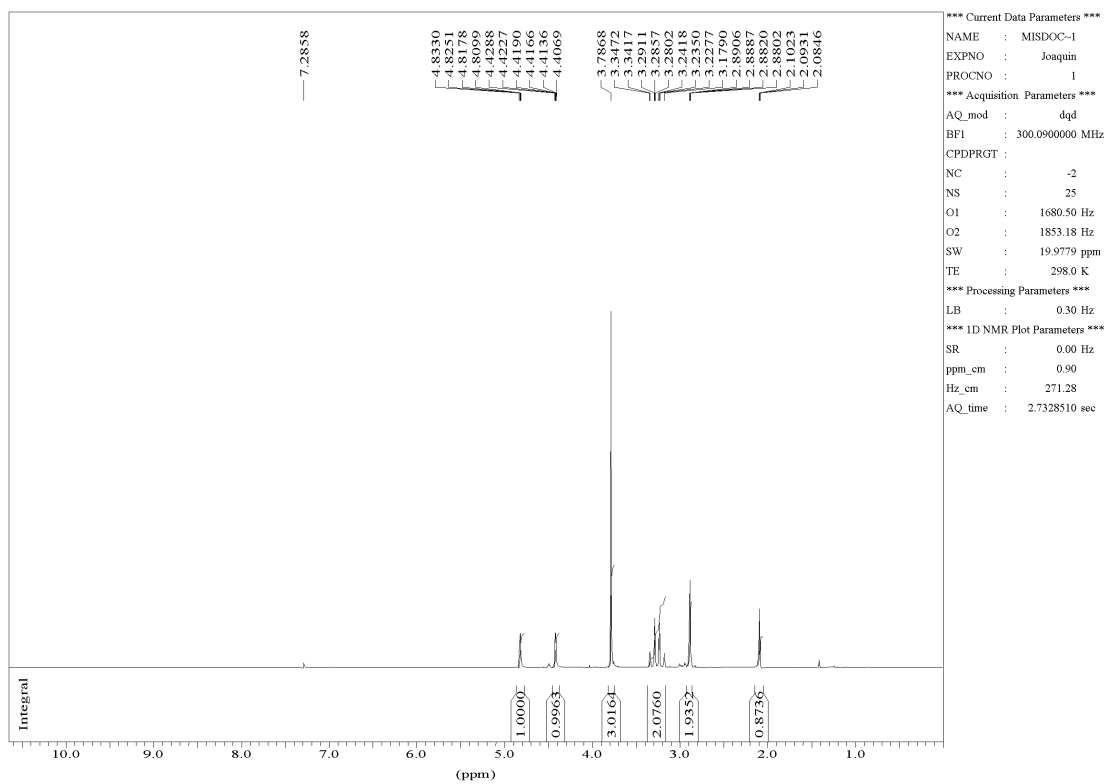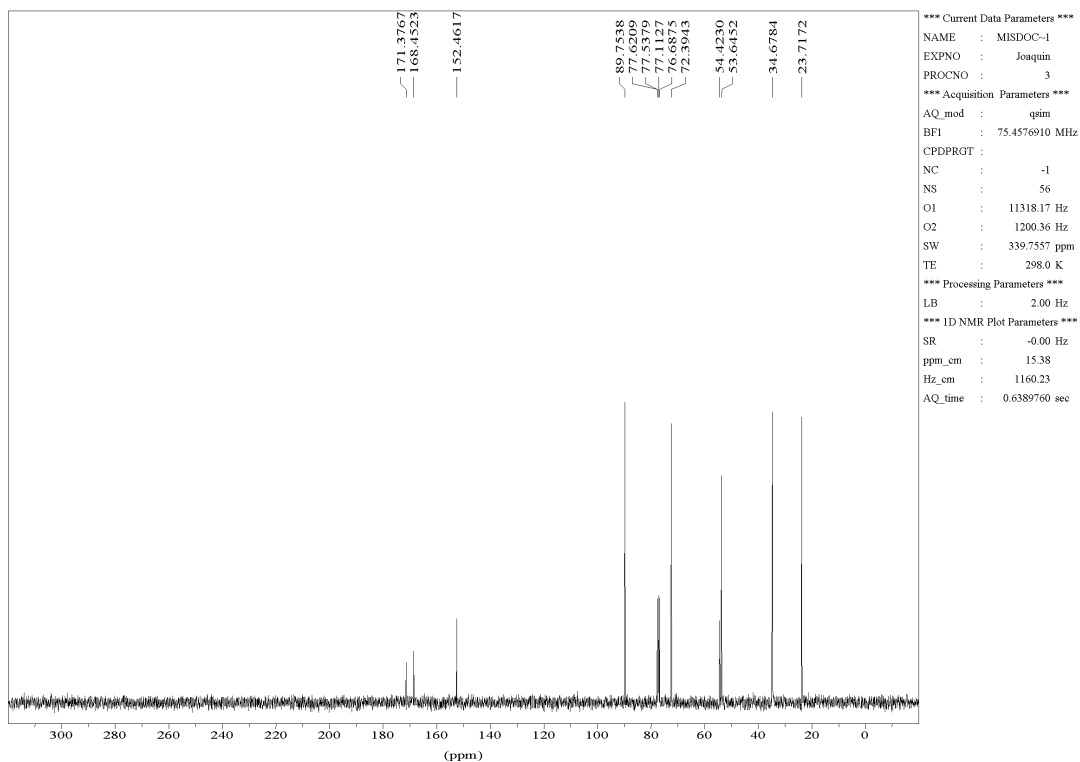

### 5-methylene-3-phenyl-3-(prop-2-ynyl)dihydrofuran-2(3H)-one (7c)

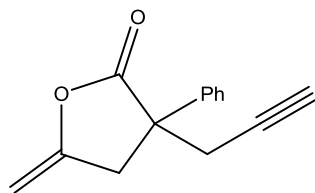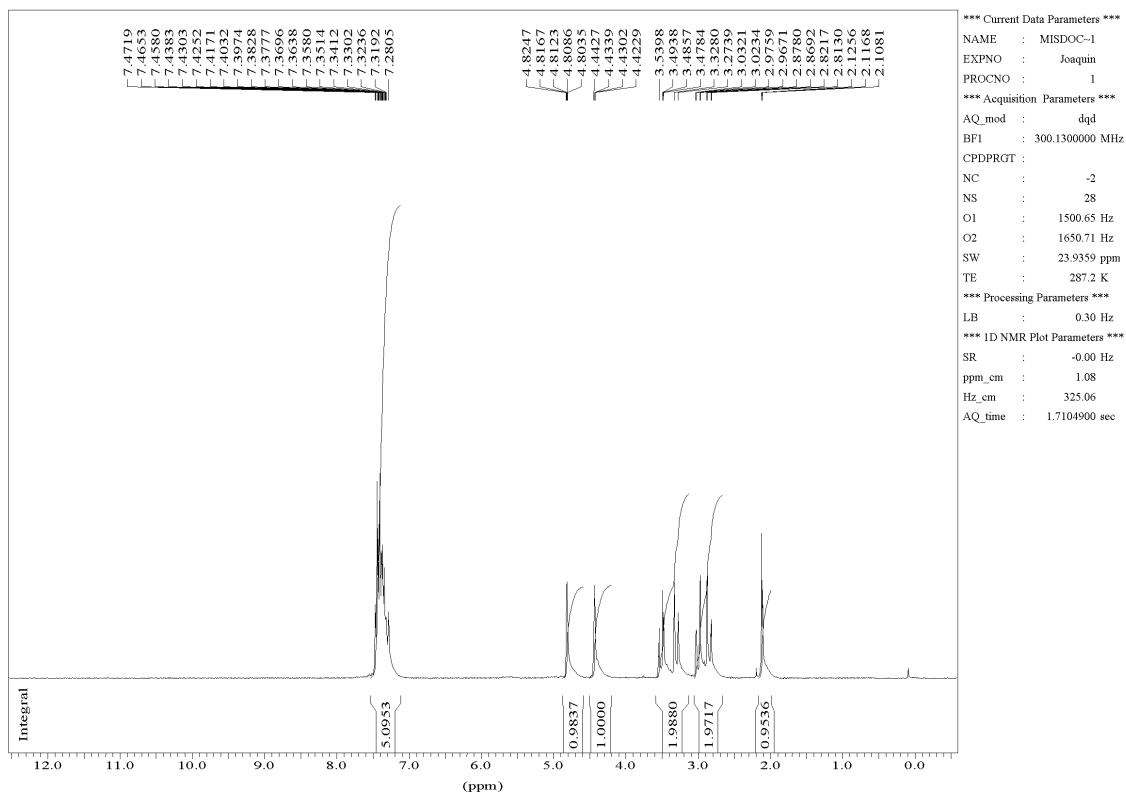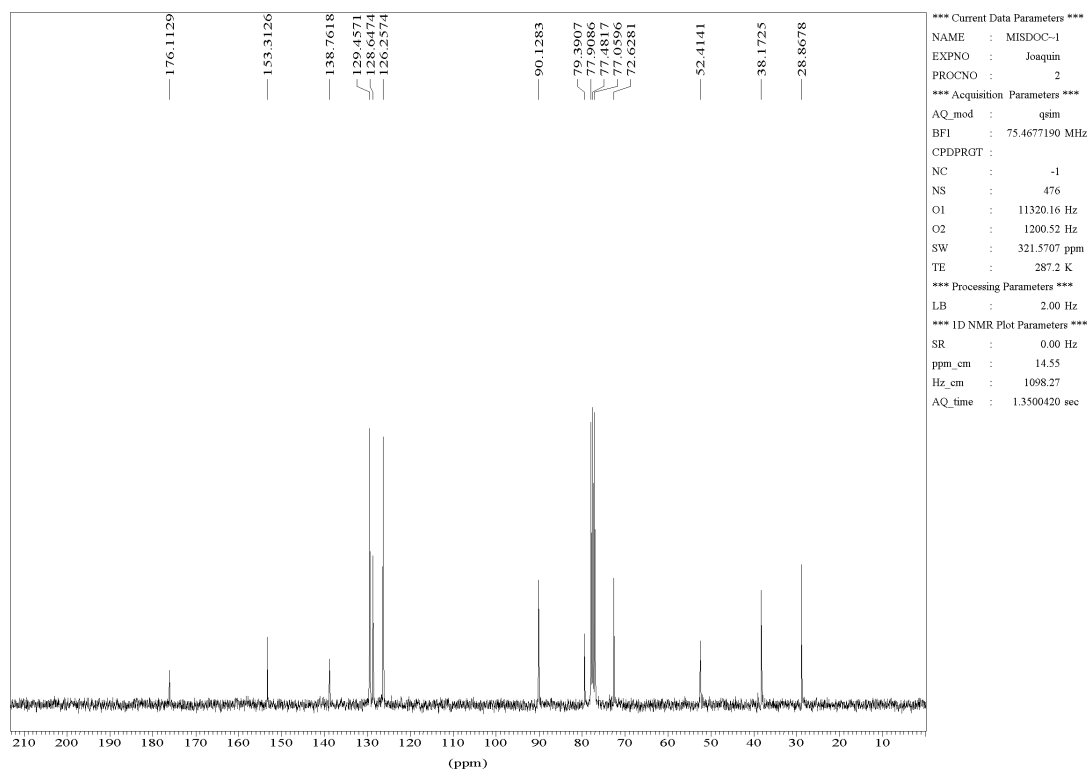

### methyl 3-(but-2-ynyl)-5-methylene-2-oxotetrahydrofuran-3-carboxylate (7d)

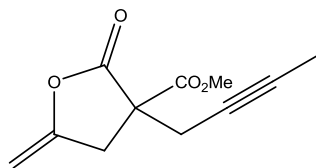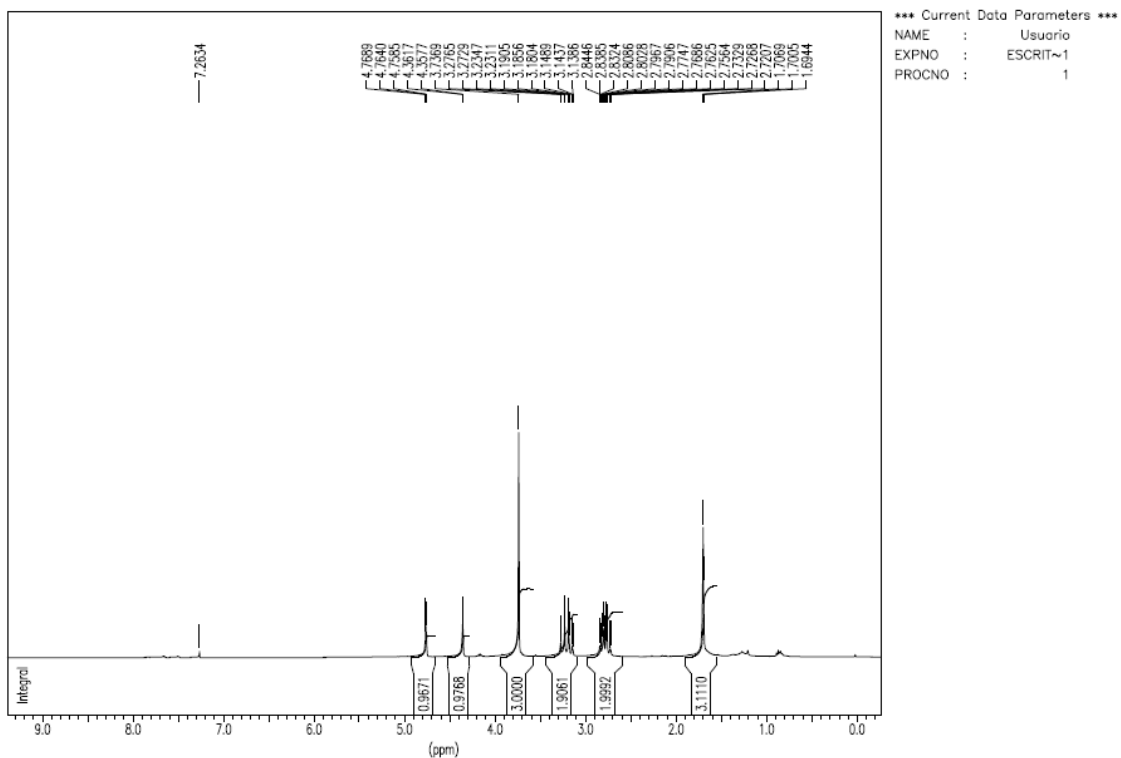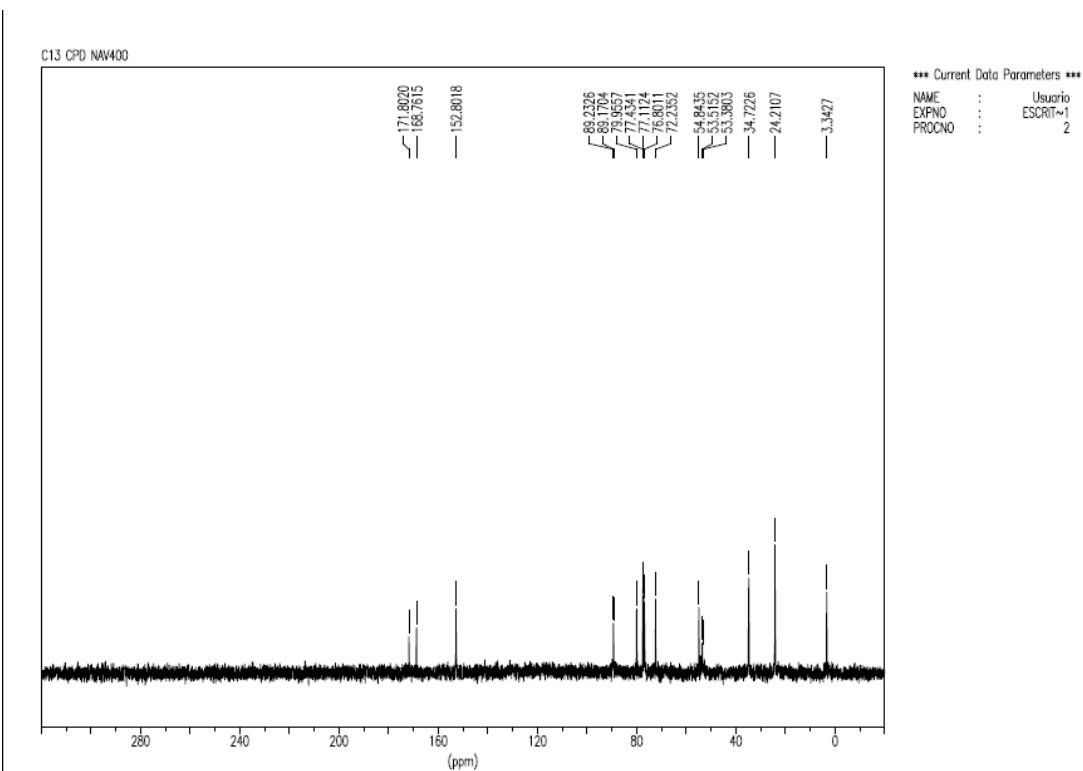

**methyl 5-methylene-2-oxo-3-(3-phenylprop-2-ynyl)tetrahydrofuran-3-carboxylate**  
**(7e)**

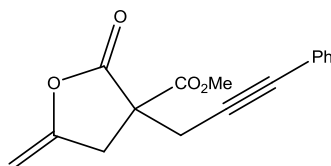

facturar a vcm  
JGC 342 Me  
h1.10 CDCl3 {C:\Bruker\boas} Bruker 40

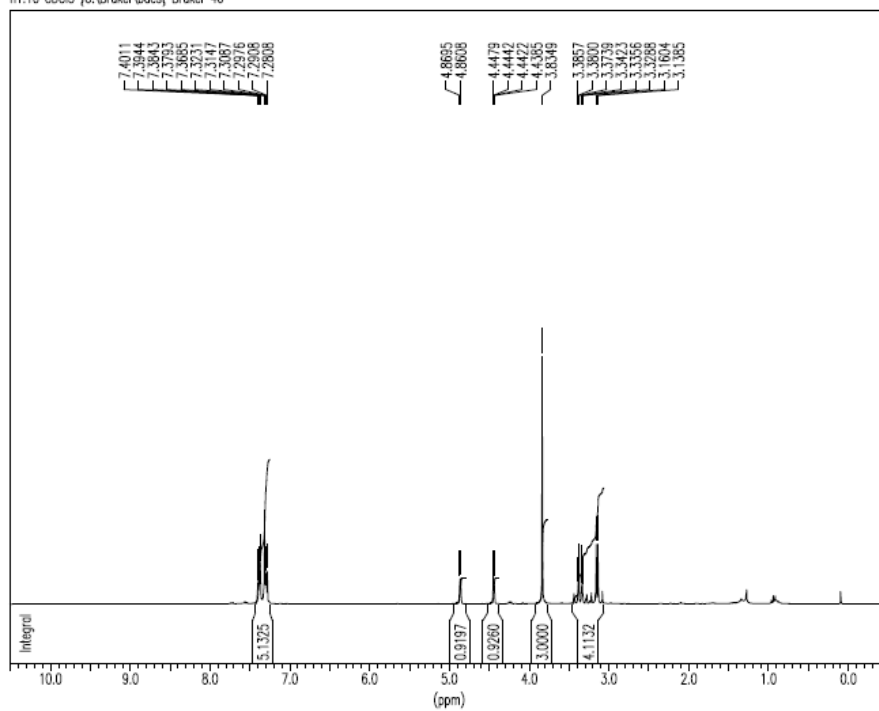

facturar a vcm  
JGC 342 Me  
c13.300 CDCl3 {C:\Bruker\boas} Bruker 40

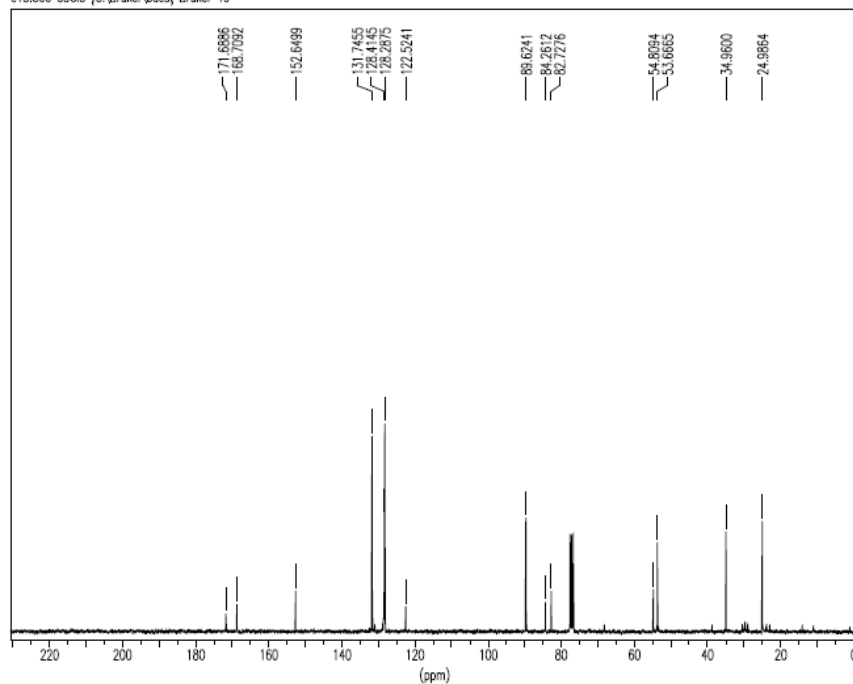

# <sup>1</sup>H and <sup>13</sup>C{<sup>1</sup>H} NMR spectra of enol-lactones 5a-h and 7a-e

## 3-((1-benzyl-1*H*-1,2,3-triazol-4-yl)methyl)-5-methylenedihydrofuran-2(3*H*)-one (9a)

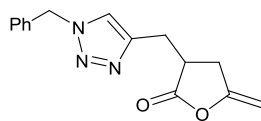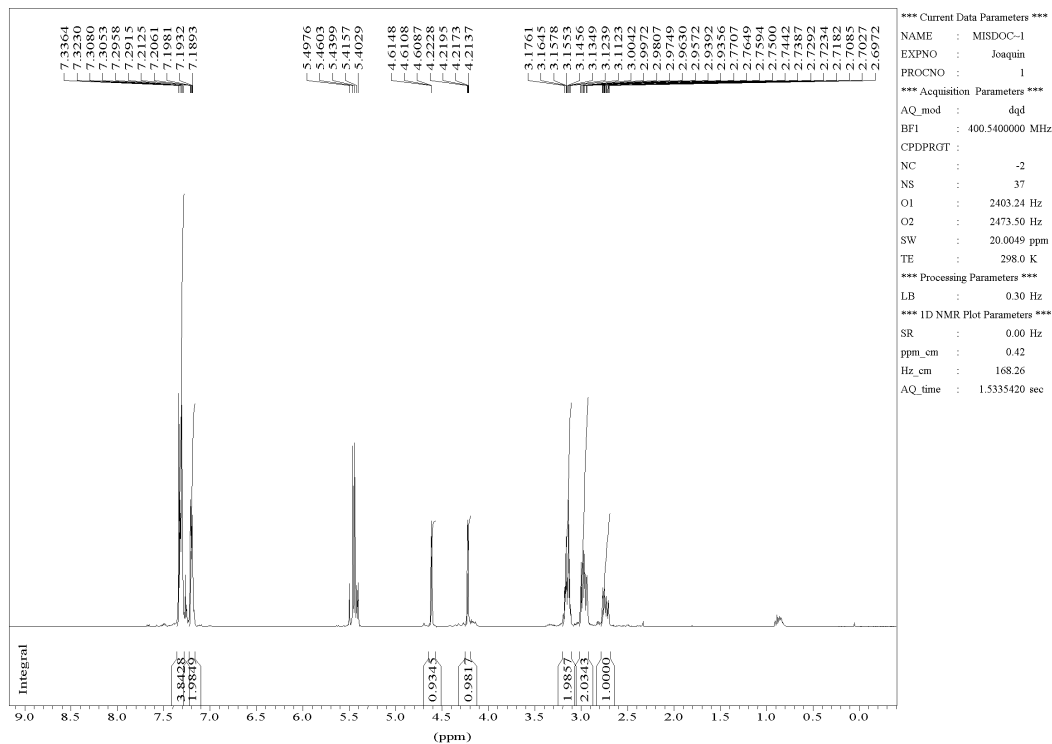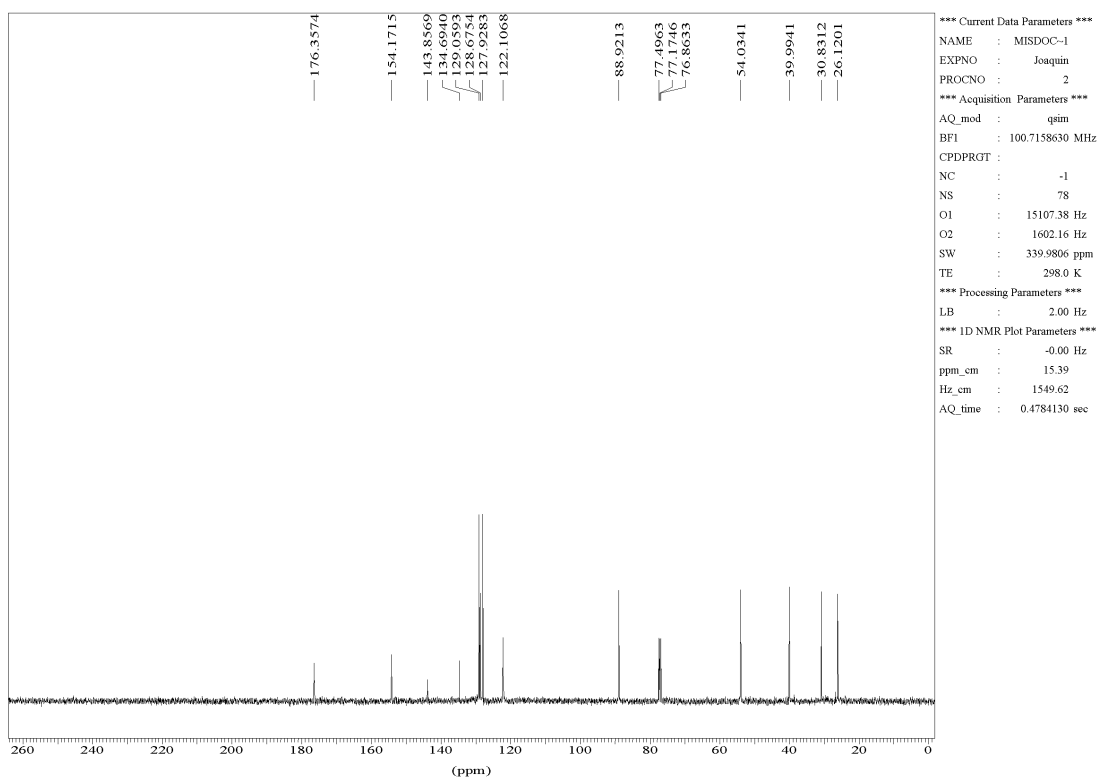

**methyl 3-((1-benzyl-1*H*-1,2,3-triazol-4-yl)methyl)-5-methylene-2-oxotetrahydrofuran-3-carboxylate (9b)**

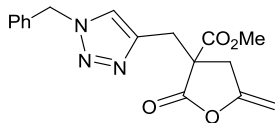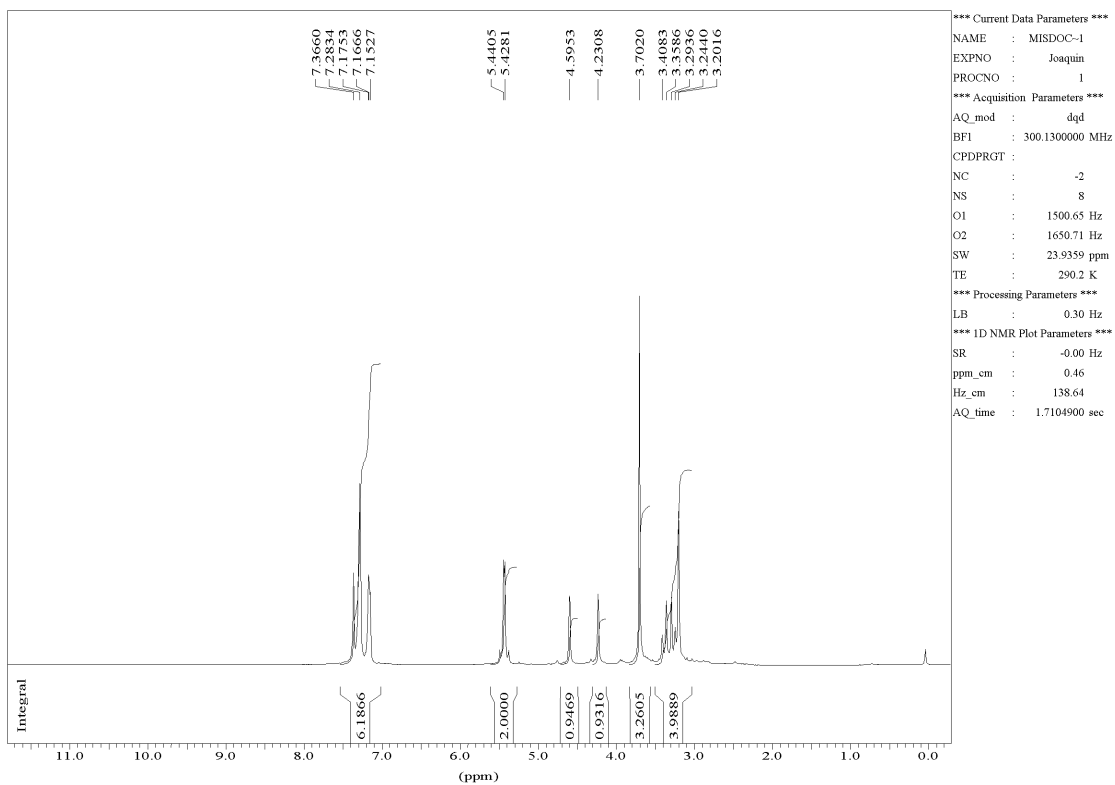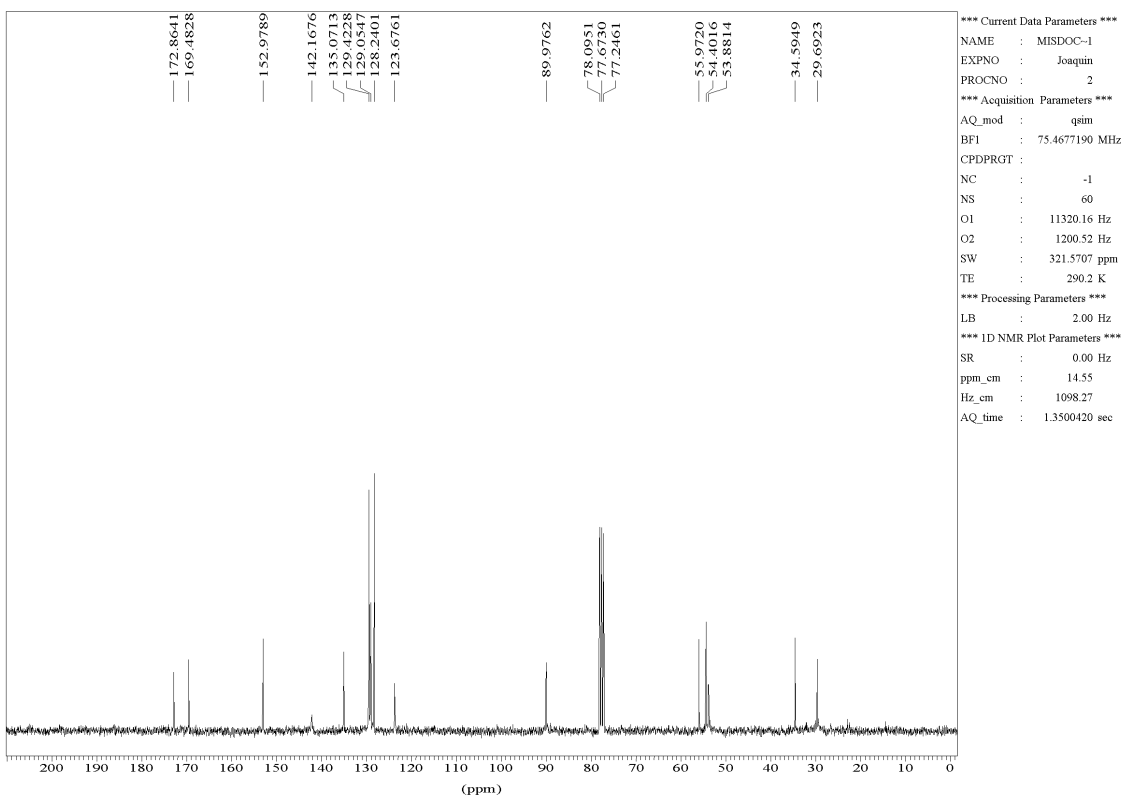



### 3-((1-benzyl-1*H*-1,2,3-triazol-4-yl)methyl)-5-methylene-3-phenyldihydrofuran-2(3*H*)-one (9c)

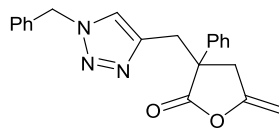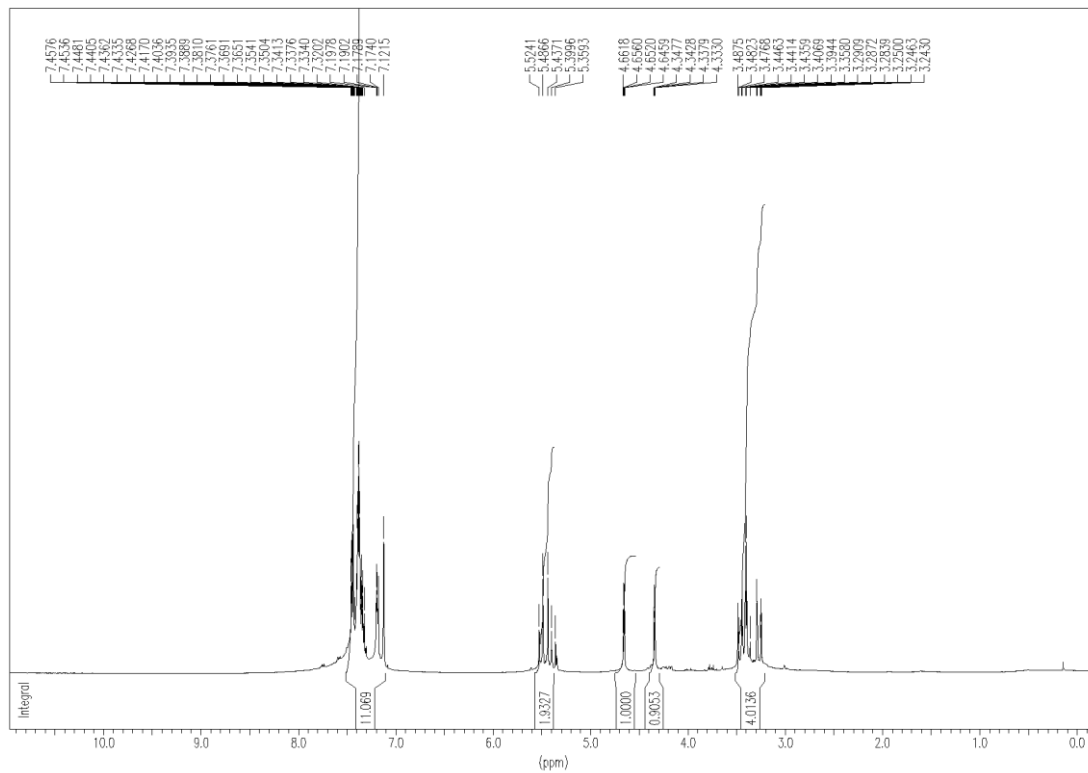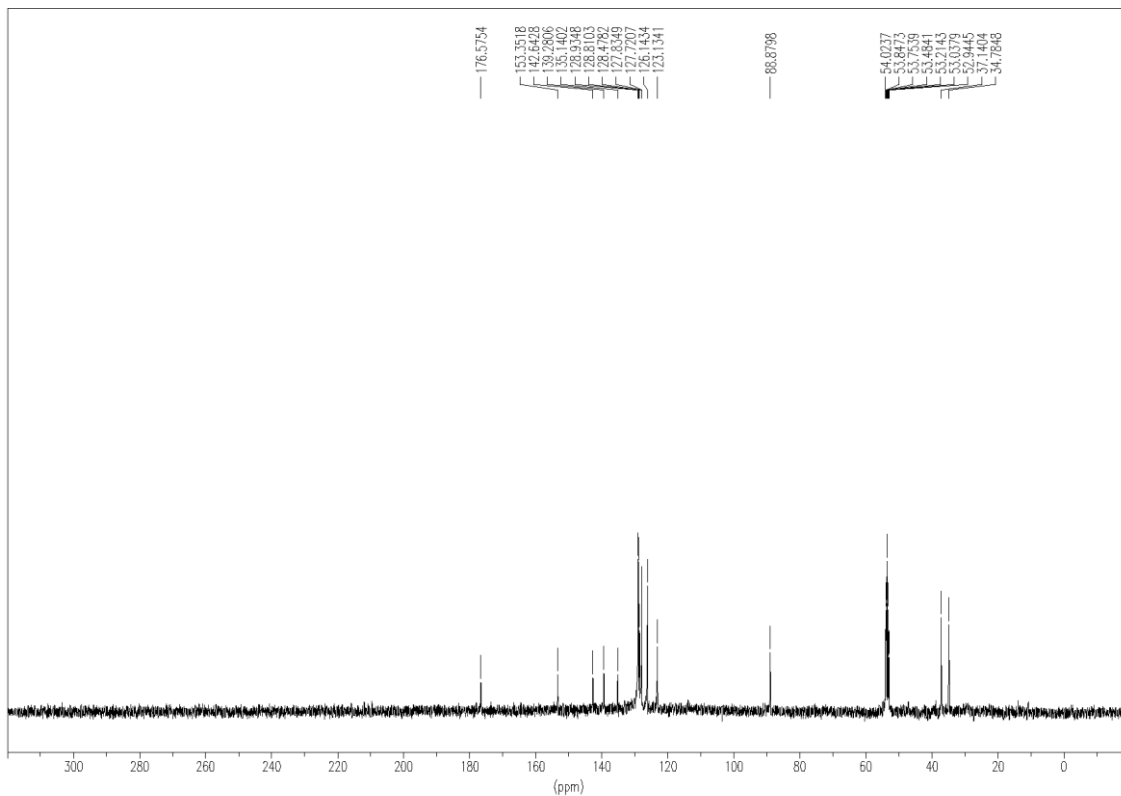

**5-methylene-3-((1-(phenylthiomethyl)-1*H*-1,2,3-triazol-4-yl)methyl)dihydrofuran-2(3*H*)-one (9d)**

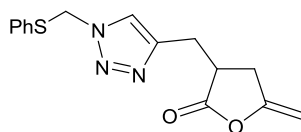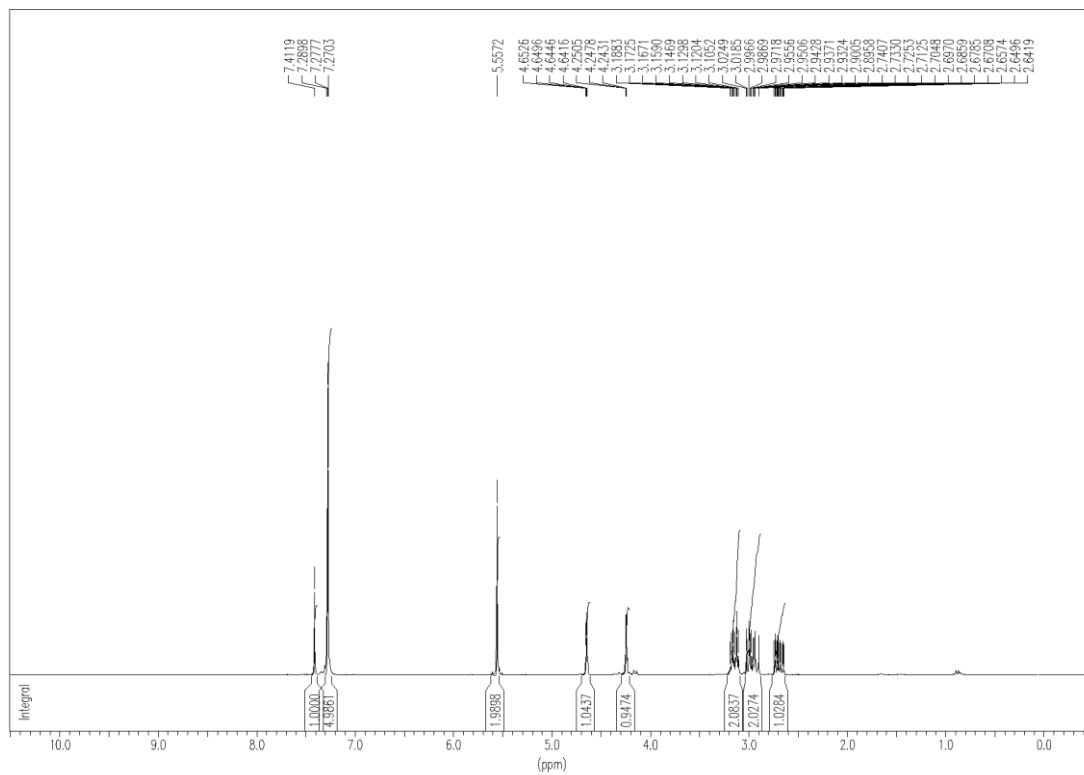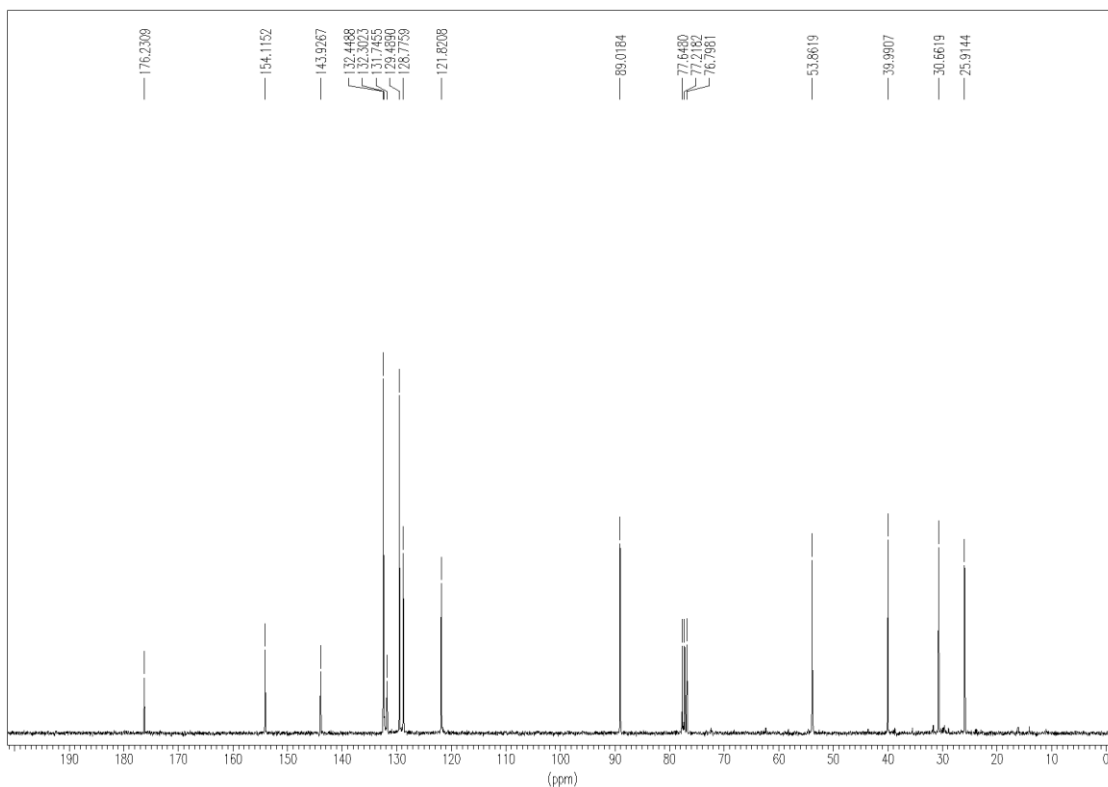

**methyl 5-methylene-2-oxo-3-((1-(phenylthiomethyl)-1H-1,2,3-triazol-4-yl)methyl)tetrahydrofuran-3-carboxylate (9e)**

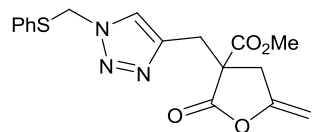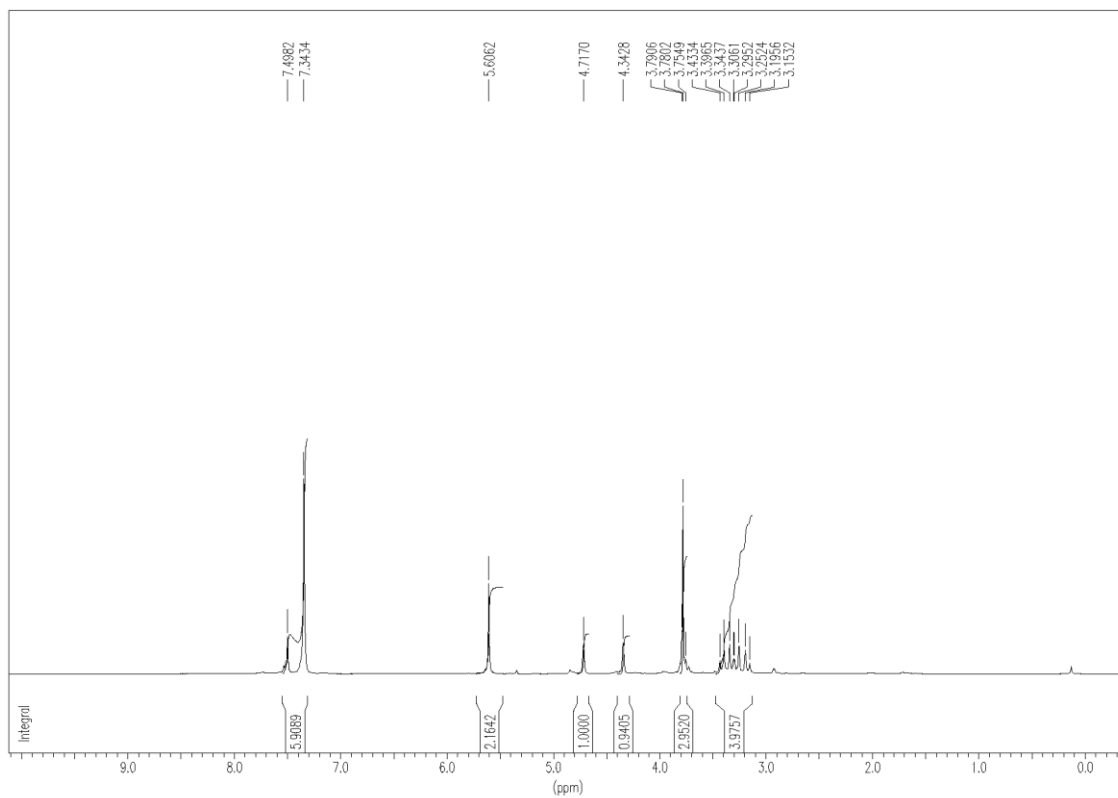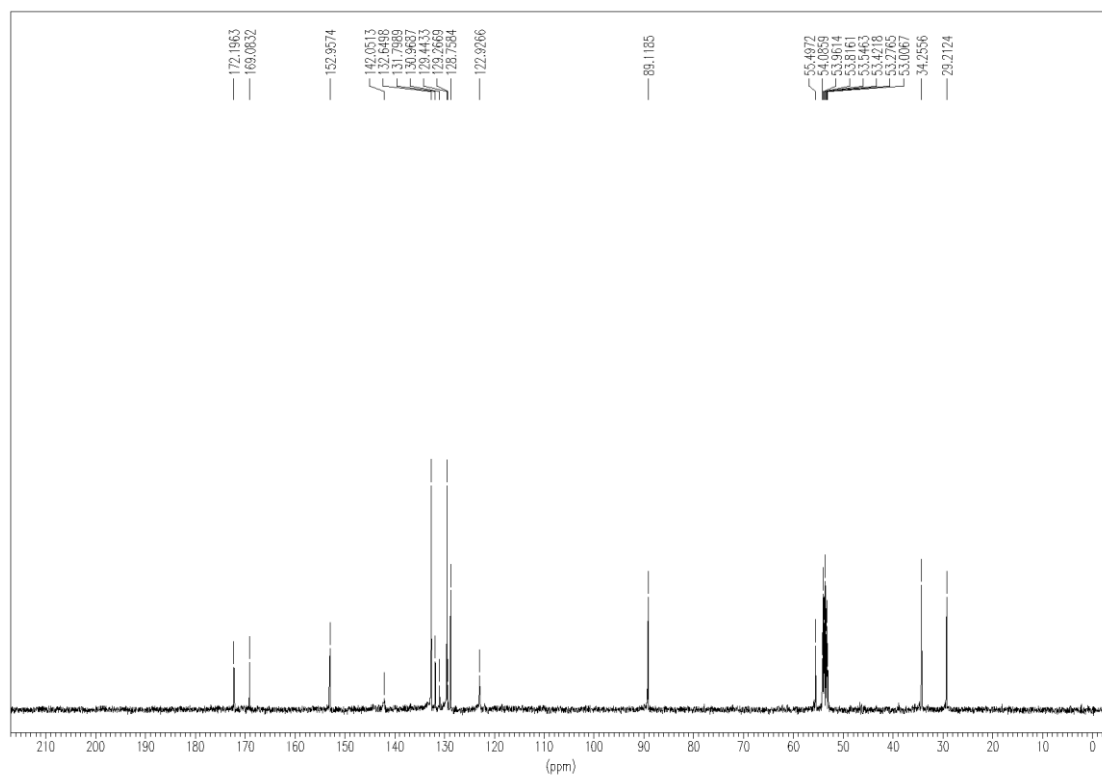

**5-methylene-3-phenyl-3-((1-(phenylthiomethyl)-1H-1,2,3-triazol-4-yl)methyl) dihydrofuran-2(3H)-one (9f)**

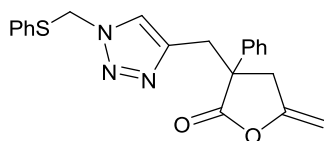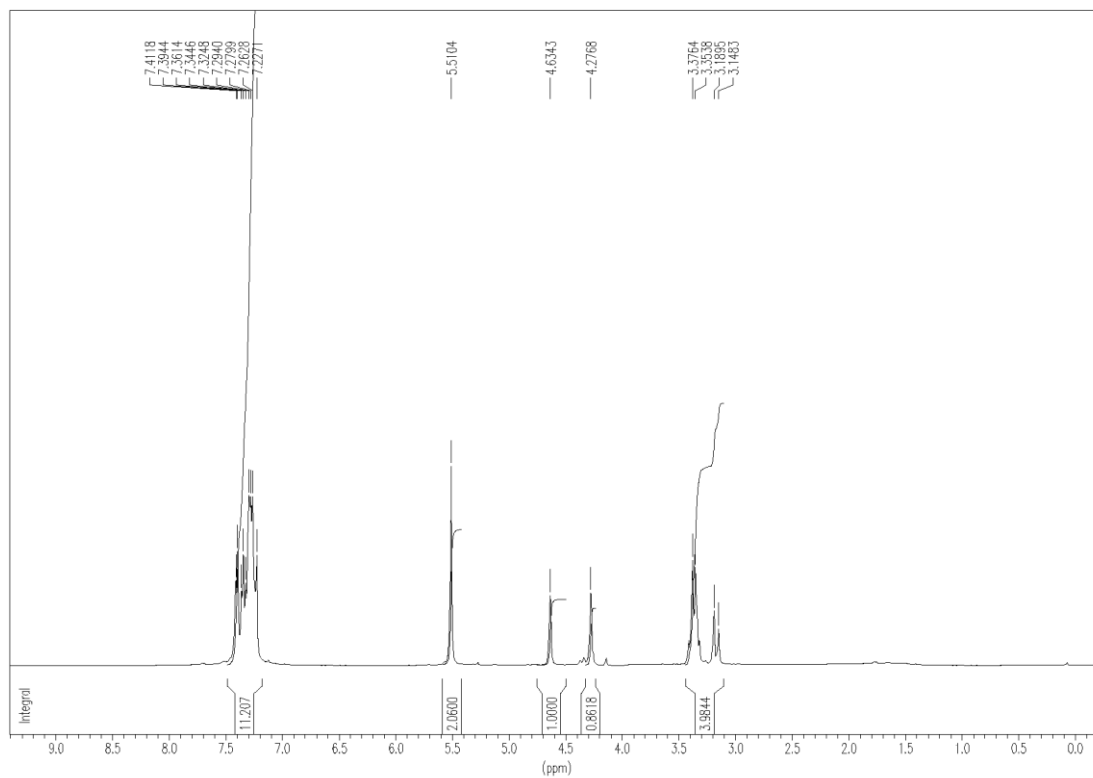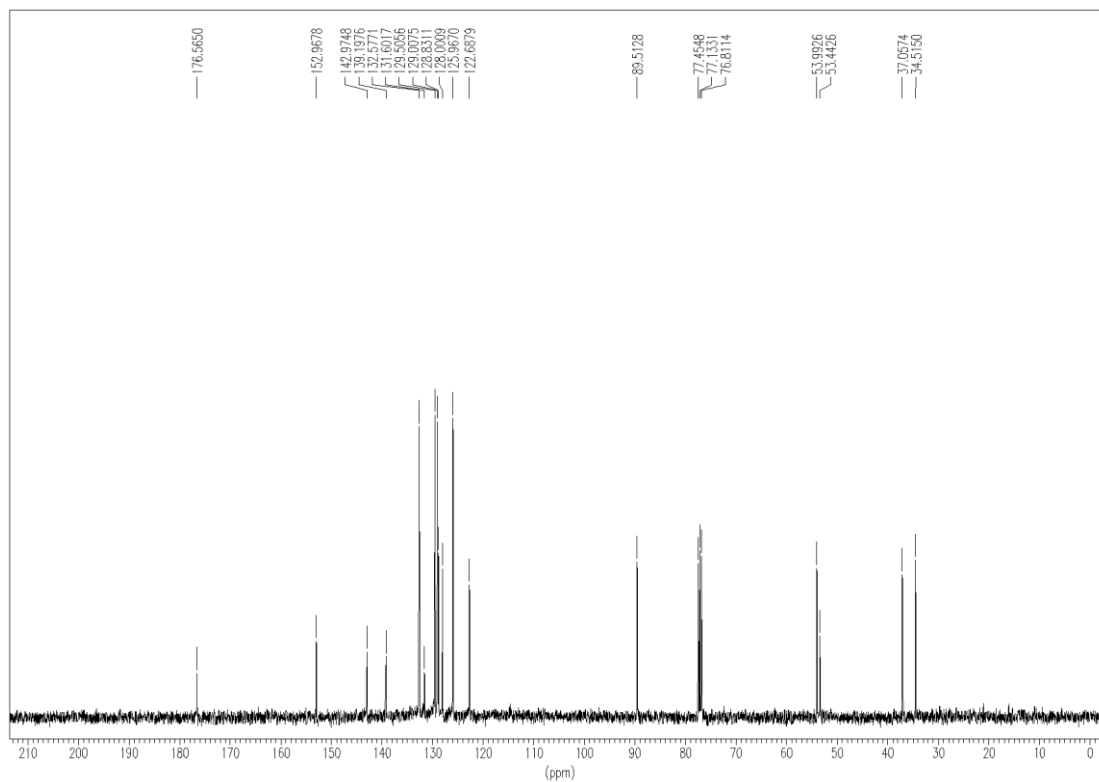

**3-((1-adamantyl-1*H*-1,2,3-triazol-4-yl)methyl)-5-methylenedihydrofuran-2(3*H*)-one**  
**(9g)**

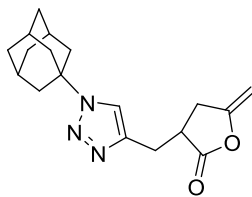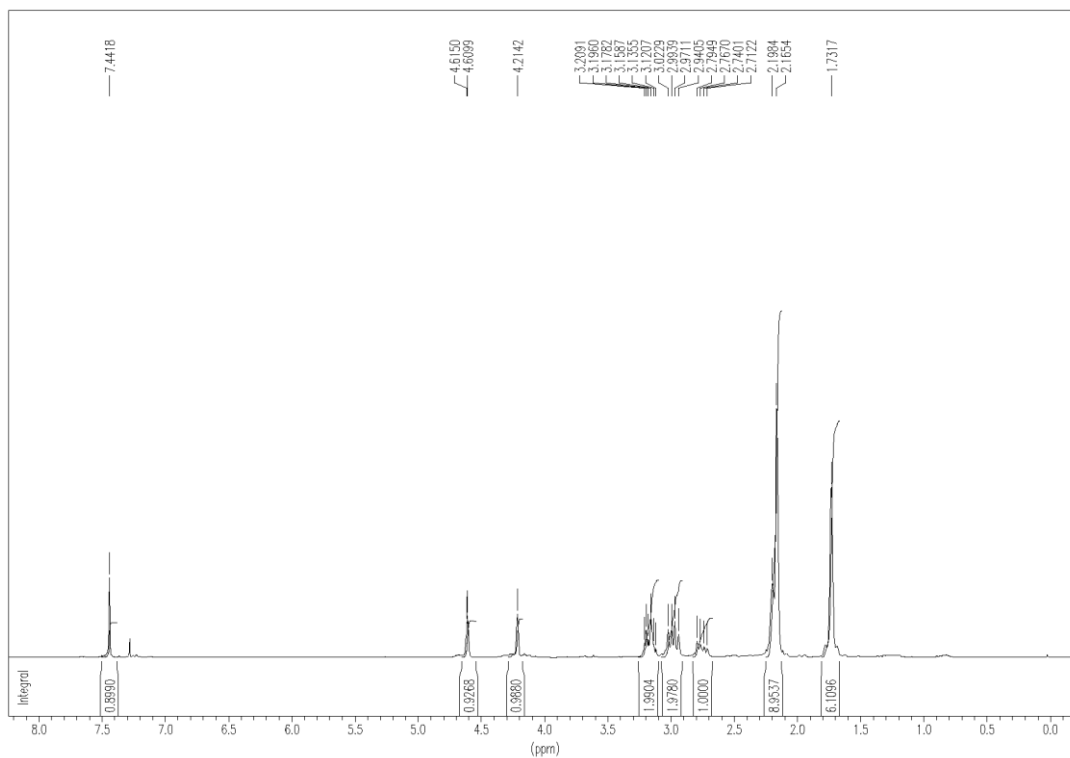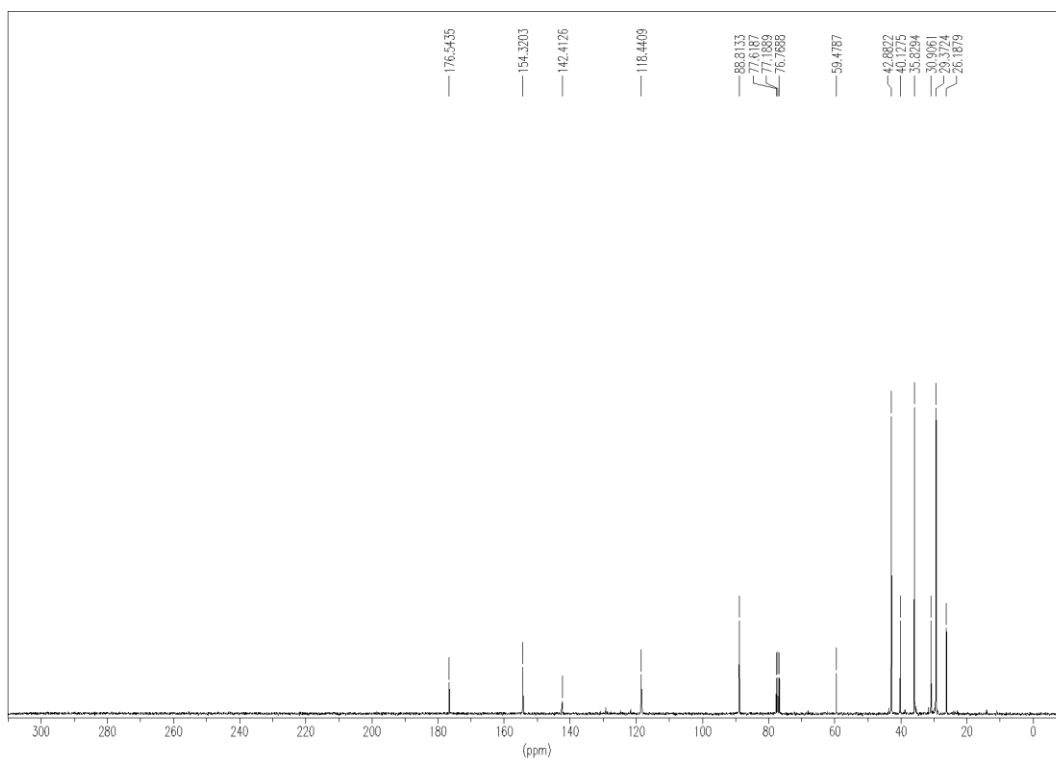

**methyl 3-((1-adamantyl-1*H*-1,2,3-triazol-4-yl)methyl)-5-methylene-2-oxotetrahydrofuran-3-carboxylate (9h)**

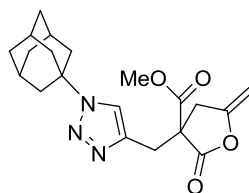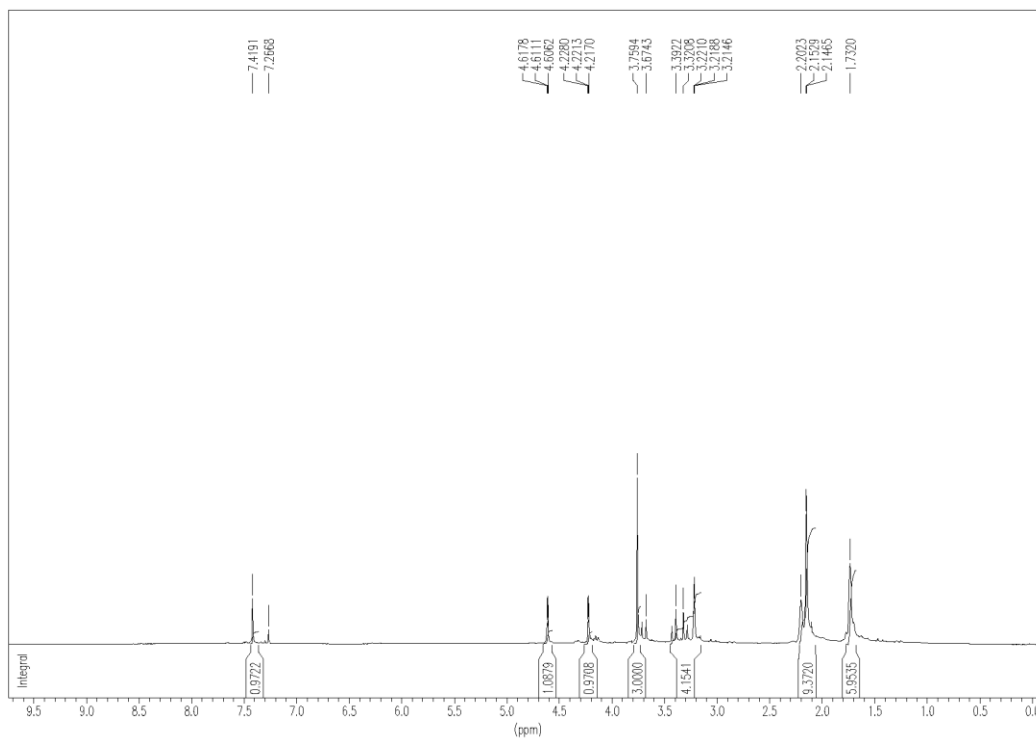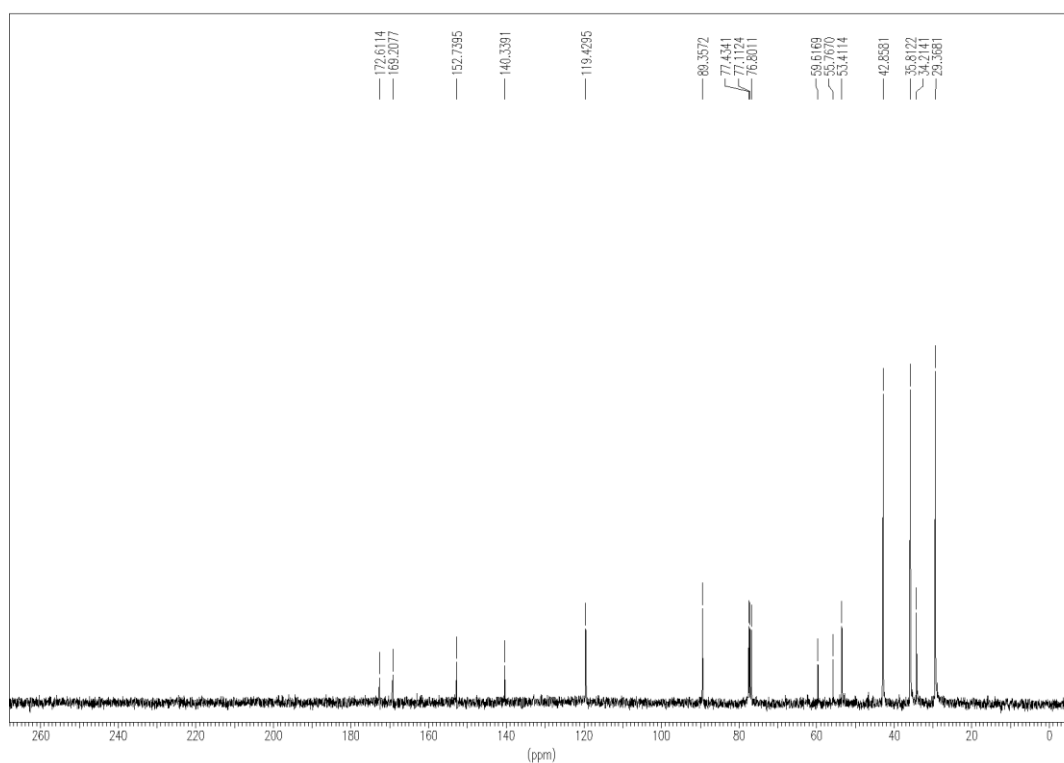



### Crystal data and structure refine for compounds **3** and **9b**

Crystals suitable for X-ray diffraction analysis were obtained by: *i*) slow diffusion of diethyl ether into a saturated solution of complex **3** in dichloromethane and, *ii*) slow evaporation of a saturated solution of the bicyclic derivative **9b** in toluene. The most relevant crystal and refinement data are collected in Table E.S.I.-1.

For **3** diffraction data were recorded on a Nonius KappaCCD single crystal diffractometer, using Mo-K $\alpha$  radiation ( $\lambda = 0.71073 \text{ \AA}$ ). Images were collected at a 40 mm fixed crystal-detector distance, using the oscillation method, with  $1^\circ$  oscillation and 35 s exposure time per frame. Data collection strategy was calculated with the program Collect<sup>1</sup> (Bruker, 2004). Data reduction and cell refinement were performed with the programs HKL Denzo and Scalepack<sup>2</sup> (Otwinowski & Minor, 1997). A semi-empirical absorption correction was applied using the program SORTAV<sup>3</sup> (Blessing, 1995).

For **9b** data collection was performed on a Oxford Diffraction Xcalibur Nova single crystal diffractometer, using Cu-K $\alpha$  radiation ( $\lambda = 1.5418 \text{ \AA}$ ). Images were collected at a 63 mm fixed crystal-detector distance, using the oscillation method, with  $1^\circ$  oscillation and variable exposure time per image (2 - 8 s). Data collection strategy was calculated with the program CrysAlis Pro CCD.<sup>4</sup> Data reduction and cell refinement was performed with the program CrysAlis Pro RED.<sup>4</sup> An empirical absorption correction was applied using the SCALE3 ABSPACK algorithm as implemented in the program CrysAlis Pro RED.<sup>4</sup>

The software package WINGX<sup>5</sup> was used for space group determination, structure solution and refinement. The structure for the complexes were solved by Patterson interpretation and phase expansion using SIR92.<sup>6</sup>

Isotropic least-squares refinement on  $F^2$  using SHELXL97<sup>7</sup> was performed. During the final stages of the refinements, all the positional parameters and the anisotropic temperature factors of all the non-H atoms were refined, (except the atoms of the molecule of ether, this disordered group was located from different Fourier maps and isotropically refined). The coordinates H atoms were geometrically located and their coordinates were refined riding on their parent atoms.



The function minimized was  $([\sum w F_o^2 - F_c^2]/\sum w(F_o^2)]^{1/2}$  where  $w = 1/[\sigma^2(F_o^2) + (aP)^2 + bP]$  (a and b values are collected in Table 1) with  $\sigma(F_o^2)$  from counting statistics and  $P = (\text{Max}(F_o^2, 0) + 2F_c^2)/3$ .

Atomic scattering factors were taken from the International Tables for X-Ray Crystallography.<sup>8</sup> Geometrical calculations were made with PARST (Nardelli, 1983).<sup>9</sup> The crystallographic plots were made with PLATON.<sup>10</sup>

**Table ESI-1** Crystal data and structure refine for compound **3** and **9b**

|                                                                  | <b>3</b>                                                                                                                    | <b>9b</b>                                                       |
|------------------------------------------------------------------|-----------------------------------------------------------------------------------------------------------------------------|-----------------------------------------------------------------|
| Empirical formula                                                | C <sub>25</sub> H <sub>56</sub> Cl <sub>6</sub> N <sub>8</sub> O <sub>5</sub> P <sub>4</sub> Pd <sub>2</sub> S <sub>2</sub> | C <sub>17</sub> H <sub>17</sub> N <sub>3</sub> O <sub>4</sub>   |
| Formula weight                                                   | 1162.28                                                                                                                     | 327.34                                                          |
| Temperature/K                                                    | 293(2)                                                                                                                      | 293(2)                                                          |
| Wavelength/Å                                                     | 0.71073                                                                                                                     | 1.54180                                                         |
| Crystal system                                                   | monoclinic                                                                                                                  | monoclinic                                                      |
| Space group                                                      | P 21/c                                                                                                                      | P 21/n                                                          |
| <i>a</i> /Å; <i>α</i> /°                                         | 12.8415(5); 90                                                                                                              | 11.6784(2); 90                                                  |
| <i>b</i> /Å; <i>β</i> /°                                         | 13.0797(5); 109.006(1)°                                                                                                     | 5.6853(1); 96.479(1)                                            |
| <i>c</i> /Å; <i>γ</i> /°                                         | 28.1381(12); 90                                                                                                             | 23.4754(3); 90                                                  |
| <i>Z</i>                                                         | 4                                                                                                                           | 4                                                               |
| Volume/Å <sup>3</sup>                                            | 4468.5(3)                                                                                                                   | 1548.70(4)                                                      |
| Calculated density/Mg m <sup>-3</sup>                            | 1.728                                                                                                                       | 1.404                                                           |
| <i>μ</i> /mm <sup>-1</sup>                                       | 1.444                                                                                                                       | 0.846                                                           |
| <i>F</i> (000)                                                   | 2352                                                                                                                        | 688                                                             |
| Crystal size/mm                                                  | 0.17 x 0.17 x 0.05                                                                                                          | 0.146 x 0.078 x 0.062                                           |
| <i>θ</i> range/°                                                 | 1.53 to 25.45                                                                                                               | 3.79 to 74.48                                                   |
| Index ranges                                                     | -15 ≤ <i>h</i> ≤ 15<br>-15 ≤ <i>k</i> ≤ 0<br>-34 ≤ <i>l</i> ≤ 14                                                            | -14 ≤ <i>h</i> ≤ 13<br>-6 ≤ <i>k</i> ≤ 6<br>-29 ≤ <i>l</i> ≤ 23 |
| No. of reflns. collected                                         | 31922                                                                                                                       | 10719                                                           |
| No. of unique reflns.                                            | 8114 [( <i>R</i> (int) = 0.051)]                                                                                            | 3079 [( <i>R</i> (int) = 0.0487)]                               |
| Completeness to <i>θ</i> <sub>max</sub>                          | 98.1                                                                                                                        | 97.4                                                            |
| No. of parameters/restraints                                     | 414/5                                                                                                                       | 218/0                                                           |
| Goodness-of-fit on <i>F</i> <sup>2</sup>                         | 0.946                                                                                                                       | 1.045                                                           |
| Weight function (a, b)                                           | 0.0813, 0                                                                                                                   | 0.0545, 0.3672                                                  |
| <i>R</i> <sub>1</sub> [ <i>I</i> > 2σ( <i>I</i> )] <sup>a</sup>  | 0.0459                                                                                                                      | 0.0389                                                          |
| <i>wR</i> <sub>2</sub> [ <i>I</i> > 2σ( <i>I</i> )] <sup>a</sup> | 0.1290                                                                                                                      | 0.0984                                                          |
| Largest diff. peak and hole/e Å <sup>-3</sup>                    | 1.870 and -1.208                                                                                                            | 0.180 and -0.292                                                |

<sup>a</sup> *R*<sub>1</sub> = Σ(|*F*<sub>o</sub> - |*F*<sub>c</sub>||)/Σ|*F*<sub>o</sub>|; *wR*<sub>2</sub> = {Σ[*w*(*F*<sub>o</sub><sup>2</sup> - *F*<sub>c</sub><sup>2</sup>)<sup>2</sup>]/Σ[*w*(*F*<sub>o</sub><sup>2</sup>)<sup>2</sup>]}<sup>1/2</sup>

## References

- (1) Bruker, **2004**. *Collect* data collection software. Bruker AXS, Delft, The Netherlands.
- (2) Otwinowski, Z.; Minor, W. *Methods Enzymol.* **1997**, 276, 307.
- (3) SORTAV. Blessing, R.H. *Acta Cryst.* **1995**, A51, 33.
- (4) *CrysAlis<sup>Pro</sup> CCD, CrysAlis<sup>Pro</sup> RED*. Oxford Diffraction Ltd., Abingdon, Oxfordshire, UK, **2008**.
- (5) Farrugia, L. J. *J. Appl. Crystallogr.* **1999**, 32, 837.
- (6) Altomare, A.; Cascarano, G.; Giacovazzo, C.; Guagliardi, A.; Burla, M. C.; Polidori, G.; Camalli, M. *J. Appl. Cryst.* **1994**, 27, 435.
- (7) Sheldrick, G. M. *SHELXL97: Program for the Refinement of Crystal Structures*; University of Göttingen: Göttingen, Germany, **1997**.
- (8) *Tables for X-Ray Crystallography*; Kynoch Press; Birmingham, U.K., **1974**; Vol. IV (present distributor: Kluwer Academic Publishers; Dordrecht, The Netherlands).
- (9) PARST . Nardelli, M. *Comput. Chem.* **1983**, 7, 95.
- (10) Spek, A. L. *PLATON: A Multipurpose Crystallographic Tool*; University of Utrecht, The Netherlands, **2007**.
